# Supplementary material for: Structural elucidation of recombinant Trichomonas vaginalis 20S proteasome bound to covalent inhibitors
Source: PubMed Central journal article supplement (PMC11452676; doi:10.1038/s41467-024-53022-w), 2024-10-04
Supplement: 41467_2024_53022_MOESM1_ESM.pdf [file 41467_2024_53022_MOESM1_ESM.pdf]

**Supplementary Information:**

**Structural elucidation of recombinant *Trichomonas vaginalis* 20S proteasome bound to covalent inhibitors**

Jan Silhan<sup>1,#</sup>, Pavla Fajtova<sup>1,2,#,\*</sup>, Jitka Bartosova<sup>1</sup>, Brianna M. Hurysz<sup>2</sup>, Jehad Almaliti<sup>3</sup>, Yukiko Miyamoto<sup>4</sup>, Lars Eckmann<sup>4</sup>, William Gerwick<sup>3</sup>, Anthony J. O'Donoghue<sup>2,5\*</sup>, Evzen Boura<sup>1,\*</sup>

<sup>1</sup>Institute of Organic Chemistry and Biochemistry AS CR, v.v.i., Flemingovo nam. 2., 166 10 Prague 6, Czech Republic

<sup>2</sup>Skaggs School of Pharmacy and Pharmaceutical Sciences, University of California San Diego, La Jolla, CA, 92037, USA

<sup>3</sup>Scripps Institution of Oceanography, University of California San Diego, La Jolla, CA, 92037, USA

<sup>4</sup>Division of Gastroenterology, School of Medicine, University of California San Diego, La Jolla, CA, 92037, USA

<sup>5</sup>Center for Discovery and Innovation in Parasitic Diseases, Skaggs School of Pharmacy and pharmaceutical Sciences, University of California, San Diego, 9500 Gilman Dr., La Jolla, CA 92093, USA

#these authors contributed equally

\*correspondence to: [fajtova@uochb.cas.cz](mailto:fajtova@uochb.cas.cz) or [ajodonoghue@health.ucsd.edu](mailto:ajodonoghue@health.ucsd.edu) or [boura@uochb.cas.cz](mailto:boura@uochb.cas.cz)

**a**

```

1      10      20      30      40      50      60      70
Tv_alfa_1  ...MSGADRYLTVFSAEGRLWQVEYVYFSAVKQAEVAVAVKSKNAVCVAVQKKVSDKLIIDPSTVTHMYRITDENVGACLV
Tv_alfa_2  ...MGDSDFSLTTFSSGCKLNQIESALKAVSLG.GQCQVGVKAKNGAVIACESSKPSLVEKVTNLKVKQKINDNVGIVYS
Tv_alfa_3  ...MTYRYDAGTTTFSSDGRILQVEYAIQSIINQA.GTAIGVQFTNGVVLAAEKKNTRGLVDYLFPEKMAKIDGHIVTAVA
Tv_alfa_4  ...MSDYTRSIITRFSSDGRILFOIDHAAHAAVQRG.TTVVATRSKDMIVIAVEKTAVAKLQDPHTFSKICSLDKHVMCAFA
Tv_alfa_5  MFNSSGSEYDRNVNTPSPDGRLLQVEYVIEAVKLG.SSAVAITLCPGVIIFAVEKRLSSQLLIASSVEKVIYALDDHVGVVMA
Tv_alfa_6  .MFRSKYDENATTFSSDGRILQVENAMKAVQQG.MPTVGLKSKTHAVIA..GVMHSPSEFSSHQPKIFKIDQHIQVVAIS
Tv_alfa_7  MSGAGSSGDFNPIITSSDGRQFQVEYATKAVEKD.SLALGVKCKDGLLAAEKNLTSTLLTPFGNPRIFWINDSIACATI

80      90      100     110     120     130     140     150
Tv_alfa_1  GLPSD VNFVIMLRFANFNFEYKQGFSTIPVSI LAQMLSE.....RHQLESQLVYV RPSAVSAIIFGLDGPSSDSFALYK
Tv_alfa_2  GVNTDFHVILKSLRKASIKYSLRGLGVEMPTREVVKHA.....AHKMQYYTQIGGV RPPFGVSLIIIGWEEL..GPTLWQ
Tv_alfa_3  GLTADANTLVLDLMTSAQKYLKTYDEQMPVEQLVRMVCDE.....KHSYTQYGGI RPPYGVSVLLIAGYDRHK.GCQLYL
Tv_alfa_4  GLHADARRLIQSGQRQCQSHRLTYEDPIIENIARYIATL.....QLKNTQSGGAR RPPYGVSTLLICGFDDMTSQPHIYE
Tv_alfa_5  GLAADGRMVEHMRVVEAQNHRFSFDEPIGKAVTQSVCDLALAFEGERRKKGQGMSS RPPFGTALLVAGIENG..KCHLFH
Tv_alfa_6  GLTADGRGLCKFLRNECLHHTFCFGTEIRVADLADTV.....ALQSQKKT SKVGVK RPPYGVGLLMIGAVD..GPRLFE
Tv_alfa_7  GHRPDCYSLVEQSRNRAETFTSNFGIKITVPLA SEVSQ.....QFHLAHYYQAY RPPFGCTVIFASYKDD...ALYA

160     170     180     190     200     210     220
Tv_alfa_1  IEPSSGYSNGFRAVAVCVKEIEAMSAIEKKMEDFETPEATAEFTLSTLQTVCGVDFEAQDVEVSLLTR...DNSKFSKLP
Tv_alfa_2  VDPSTGTFWAKKATALGKRRSDGSRTFLERRYS EDQSVDDAIHTAISTLKEGFDGQL...TAELEIG.VVDETRKRFILS
Tv_alfa_3  TDPSSNFGGKKAIAIGENNQTQSI LKSOYKDNMTATEAMDLTVKVLCCKLTDSTLSADKLEFAVLFQFREEYGPVKVRIIT
Tv_alfa_4  TLPSSGTYAEWKAARTIGRHDQTVMEYLEKHYKDDMTDEEAQKLAIGALLEVVENGSKN...LEVAYMK...RGGTMEIMA
Tv_alfa_5  TDPSSGTYTECRRAIIGGSEGAELLRDLYKDGMTLHEAEDLALSTLRQVIQEKLNENNVEVACARV.S...TGKFEIYT
Tv_alfa_6  TDPSSGQHWEYNAIIGRRRAQAAKTYLETNLNEFPDC.TRDQLIRHALRLANDCKSRESDSLEAIALG.VVGIDEPFTILE
Tv_alfa_7  IEPSSGAFYGYFAISCFCKNSNLARAEIQKTEWKNTVRAEAVPEVARIKSLHEESQFKKWEIEMF.WLC.EETNGRPQVVE

230     240
Tv_alfa_1  NDKVNEILHAVA EKD.....
Tv_alfa_2  TAEIRDFL TEV.....
Tv_alfa_3  TSEVDTLMKRYEETIKKSAE EKE
Tv_alfa_4  EEVLDALESTKAK.....
Tv_alfa_5  SEQRQEI VARLPPP IPE.....
Tv_alfa_6  GPELQKYID.....
Tv_alfa_7  DVFQSRFVNENPQN.....
    
```

**b**

```

1      10      20      30
Tv_beta_1  .....MSEYQFP.KESMGTLLAIQCTDGVVMASSRTSSGSGSFI
Tv_beta_2  .....MEAGLGFDPSNYARNK...SLEPKLGKPLSTGTIAAAIFDGGVVLGADTRATAGPIV
Tv_beta_3  .....MSD...ISTYNGS CVLAMAGDHCVAIASDRRLGNVMLT
Tv_beta_4  .....MLSIGLQGPDWVLIADSSVSSSIIIC
Tv_beta_5  MQSLYLKPRDEVESEETKALEPAHVDPDQCFVKNHISLSTYNEPQGM.AAVHGTTLTSFIYNGGIVVAVDRATGGQFI
Tv_beta_6  .....ME.....GEFRENK.....KGQWSPYEMHGGTAIGICGDDYVVI GADTRRLSDVYSI
Tv_beta_7  .....MQVITASGAIVAAKYDGGILLASDLSITYGSMF

40      50      60      70      80      90      100     110
Tv_beta_1  PNRATNKITEIQPKIFAARC GNAADTQFLARAVKNYLINALNITRENTDSDSTILVANSVIRSLT...VRYRQY.LSAGVIV
Tv_beta_2  AVKDEMKLHYISDN IWVCGAGIAADNDNINAVISAKLR LRFQMTG..LQPRVDOC TNLASRL...FOYMGY.IQAALIV
Tv_beta_3  VSKDFKRIFQINDRIYLG LAGLATVLTVREQLRFVDVNLLELREE..RPIDPKKFMNLVKSTLY.EKRFSPF..FVTFVI
Tv_beta_4  MSENYDRIAQLDDRHALAMGETGDCLOLSEYLOGNVALYKFRNGVE..LSSDALAHFIRHTMAKAVRKS P..YEVNMLL
Tv_beta_5  FSQTVMKILPLAPNMIGT MCGAADCQYWLRLNLSRLIQ LHKFRYQ..QPLTVAAASKILVNEL...YRYKGYNLSIGSMI
Tv_beta_6  DSRHKARIFKMN SNCMISATGFDGDIDAFITRMR SILL..NYENQHFHEMSVESVARCVSNTLY.SKRFFPY..YINILV
Tv_beta_7  RHNVSHFVEVAPNIIGASGEFADFQTLIEVIKSVILQ QQCKHN.GEYLTASEVHNYIKRYMYQCRSNMK.PLSCRVIV

120     130     140     150     160     170     180
Tv_beta_1  GCVWDS..AGPQVYSIEVSCMA.IKKKIASNGSGS TYIQAYIDQNYR.....EDMTMEEATKFAIAAVTGAIIRDGGS
Tv_beta_2  GCIDF..QGPOVYQVAPHCSF.SKQFFIAQCGSSGLAAISVLENRWH.....NKMNHEHDCMEMVADAIYAGITNDIG
Tv_beta_3  ACLLPETNEP YL AASDSICAFAPKDFAVACTCESLYGICESA WR..PNMNPDELFECTAKCLIAAVERDSI
Tv_beta_4  SCYDG...KPHLYFMDYLC TL.QSIPYGAQCYCYFVMSVFDKHYK.....EGLTLEDGKELMKLALNQIKQRFTV
Tv_beta_5  CGYDN..TGPHIFIIDNHCSR.IAGKRFVSGSSTHAYGVLDTCYR.....EDMTKEEACELGRRATYHATYRDSSG
Tv_beta_6  GGLNSEG.KGKLYGDPVCTI.EDLHYDSNGSGS SLAAPL LDDSAFGTIIHNTTRPFPVSLQDAKNIVRDIAICSVTERDIY
Tv_beta_7  AGINPDG.SKFLACTDPYCAS.WESDHIGTCFGKYLQGLQIADV...VNGSFDVVKKGI TEVFRVNRNTT

190     200     210
Tv_beta_1  SGGVNVIVQINADGAKRMTVRPAQQPFN.YDIVKG.....
Tv_beta_2  SSSHVNL CVIKRENPEDKQSKVIYTFYKDYRVPHEHNDNRFLRLEPQINNIDVEVIKTTTERPLTLPDVHLEILD DAPA
Tv_beta_3  SGGGIVYIITQDKV IIKEIKTRMD.....
Tv_beta_4  APHGFIKLV DKNGITKIDLE.....
Tv_beta_5  SGRVSVVHITQNGVEWIDKTDVDFMDHD.FSKTTF.....
Tv_beta_6  TGDALQLCVFTKDCFAQEFP LPRH.....
Tv_beta_7  ANGKIEFITVTPQGINHLAPEQID...PNWEVVEGTWDQ.....
    
```

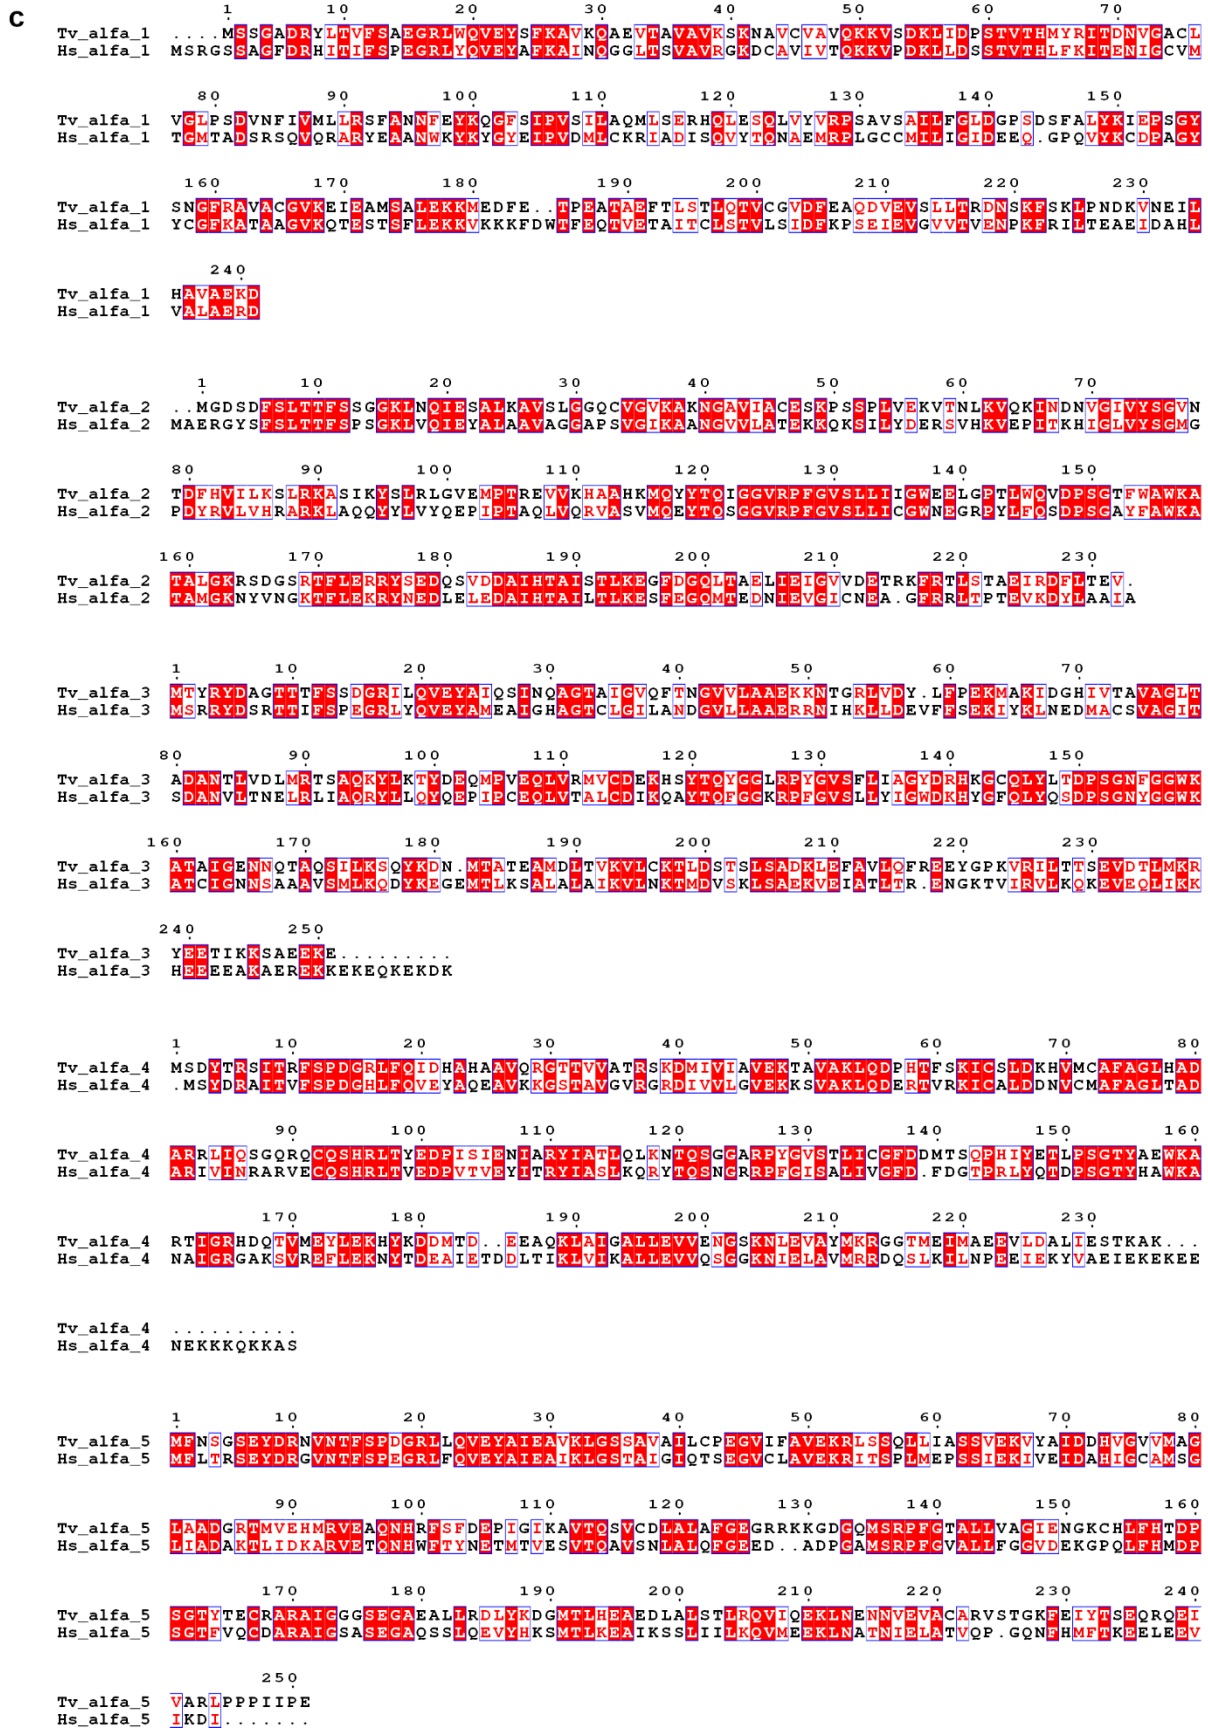

1 10 20 30 40 50 60 70 80  
 Tv\_alfa\_6 MFRSKYDENATTFSPREGRILOVENAMKAVQOGMPVGLKSKTHAVIAGVMHSPSEFSSHCPKIFKIDOHIGVAISGLTAD  
 Hs\_alfa\_6 MFRNQYDNDVTWSPQGRHIOIYAMEAVKQGSATVGLKSKTHAVLVALKRAQSELAASHCPKILHVDNHICISIALGLTAD

90 100 110 120 130 140 150 160  
 Tv\_alfa\_6 GRGLCKFRNECTHHTFCRGTETRVADLADTVALQSOKKTSKVKGRPYGVGLLMIAGVDGPRLEFCPSGQHWENYQA  
 Hs\_alfa\_6 ARLLCNFMROECLDSRFVDRPLPVSRLVSLIGSKTQIPTQRYGRPYGVGLLIAGYDDMGPHIFQFCPSANYFDGRAMS

170 180 190 200 210 220 230  
 Tv\_alfa\_6 IGRRAOAAKTYLETNLNERPDCRTRDQLIRHALLRATNDCKSRRESDSLLEATALGVVCIDEPFTILEGPELQKYID.....  
 Hs\_alfa\_6 IGRASOSARTYLERHMSEEMECNLNELVLRHGLRATRETLPAEODLTKNVSIGIVCKDLEFTIYDDDDVSPFLEGLEERP

Tv\_alfa\_6 .....  
 Hs\_alfa\_6 QRKAQPAQPADEPAEKADPEMEH

1 10 20 30 40 50 60 70 80  
 Tv\_alfa\_7 MSGACSGYDFNPIFFSPDGRQFOVEYATKAVEKDSLALGVCKCKDCHLLAAEKNLTSITLTPCGNPRFVWINDSIACATIG  
 Hs\_alfa\_7 MSSIIGTYDLSASFSPDGRVFOVEYAMKAVENSSTAIGRCCKDGCVFVGEKLVLSKLYEPCSNKRLFNVDHRHVGMAVAG

90 100 110 120 130 140 150  
 Tv\_alfa\_7 HREDCYSIVEQSNNRAETSTSNFCIKITVFPQLASEVSSQGFHLAHYQAYRPFPGCTVIFASYK...DDALYATEPSGAFYG  
 Hs\_alfa\_7 LLADARSLADIAREEASNRSNFCYNIPLKHLADRVMYVHAAYTLYSAVRPFPGCFMFLGSYSVNDGAGLYMIDPSGVSYG

160 170 180 190 200 210 220 230  
 Tv\_alfa\_7 YFASCFGNNSNIARAELOKTEWKNITVREVPVARIIKSLHESQFKKWEIEMFWICEEINGRPQKVPEDVFQSRFV..  
 Hs\_alfa\_7 YWGCAIGKARQAATEIEKLMQKEMTCRDIVKEVAKIITYVHDEVKDKAFELLELSWVGEINGRHEIYVQKDIREEAEKYA

240  
 Tv\_alfa\_7 NENPQN.....  
 Hs\_alfa\_7 KESLKEEDESDDDNM

**d**

1 10 20 30 40 50 60 70 80  
 Tv\_beta\_1 TTLIAIQCCTDGVVMASDSRTSSGSFIPNRATNKITEIQPKIFAARCNAADTQFLARAVKNYLNALNITRENTDSDTILV  
 Hs\_beta\_1 TTIMAVQFDG GVVLGADSRRTTGSYIANRVTDRKTEIHDRIFCCRS GSAADTQAVADAVTYQLGFHSITEL..NEPPLVHT

90 100 110 120 130 140 150  
 Tv\_beta\_1 ASNVIRSLIVRYRQYLSACVIVGCVDS.AGPOVYSIEVSGMAIKKIIASNGSGSSTYIQAVIDQNYREDMTMEEATKAIIA  
 Hs\_beta\_1 AASLIFKEMCYRYREDLMAGTIIAGWDPQEGGOVYSVPMGMMVVRQSF AIGSGSSSYIYGVIDATYRGMTEKBECLQETAN

160 170 180 190 200  
 Tv\_beta\_1 AVTGAIIRDGSSGGVNVIVQINADGAKRMTVRPAQPF.NYDIVKG.  
 Hs\_beta\_1 ALALAMERDGSSGGVIRLAAIAESGVERQVLLGDQIPKFAVATLPPA

1 10 20 30 40 50 60 70 80  
 Tv\_beta\_2 TTIIAAIFDGGVVLGADTRATAGPIVAVVDEMKEHYISDNIVWCCAGIAADNDNINAVISAKLRLRFQMNTGLQPRVDQCT  
 Hs\_beta\_2 TTIIAGVYKDGIVLGADTRATEGMVVADNCSKKEHFISPNIYCCGAGTAADTDMTQLISNSNLELHSLSTRLPRVVTAN

90 100 110 120 130 140 150 160  
 Tv\_beta\_2 NITASRLIQYMGYIQAALIVGGIDFQGPVYQVAPHGSPKQPFIAQSGSLAAISVLENRWHNKNEHDCMEMVADAIY  
 Hs\_beta\_2 RMLKQMLRYQGYIQAALVLLGGVDVIGPHLYSIYPHGSDKLPYVVMGSGSLAAMAVFEDKFRPDMEEBEARNLVSBAlA

170 180 190 200 210 220  
 Tv\_beta\_2 AGITNDLGSGLHVNLCVIRKENPEDKQSKVIYTEYKDYRVP HENDRN...R.....TEPQINNIDVEVIKTERPL  
 Hs\_beta\_2 AGIFNDLGSGLNIDLCVIRSKNKL.....DLRPPYVFNKKGTRLGRYRCEKGTAVTEKTEPLEIEVLEEIVQTM

230 240  
 Tv\_beta\_2 TLPDVHLEILDDAPA  
 Hs\_beta\_2 DTS.....

1 10 20 30 40 50 60 70 80  
 Tv\_beta\_3 MSDTSTYNGSCVLAAGDHCVAIASDRRLGVNMLTVSKDKRIFQINDRIYGLAGLATDVLTVREQIRFDVNLLETRRE  
 Hs\_beta\_3 .MSTMSYNGGAVVAMKGNKNCVAIASDRRFGIAQAMVTDTRQKIFPMGDRLYIYGLAGLATDVLTVQAQRKFRNLNLYELKEG

90 100 110 120 130 140 150 160  
 Tv\_beta\_3 RPIIDPKKFMNLVKSLEYKRFSPFFVTPVIAGLLEETNEPFLAASDSIGAFAPFKDFAVAGTCEESIYGCESAWRPNMN  
 Hs\_beta\_3 RQIKPYTLMSSMVALLEYKRFSPFYTEPVIAGLLEKTFKDFICSLDIGCFMVTDDFVVSCTCAEQMYGMCESLWEPNMD

170 180 190 200  
 Tv\_beta\_3 PDELFECTAKCLIAAVERDSISGWGIVYIITQDKVIEIKIKTRMD  
 Hs\_beta\_3 PDHLEFETISQAMLNAVDRDAVSGMGVIVHIEIKDKITTRTLKARM

1 10 20 30 40 50 60 70 80  
 Tv\_beta\_4 M L S I V G L Q C P D W V L I A A D S S V S S S I I C M S E N Y D R I A Q L D D R H A L A M S G E T G D C L O L S E Y L Q C N V A D Y K F R N G V E L S S D A L  
 Hs\_beta\_4 M E Y L I G I O C P D Y V L V A S D R V A A S N I V Q M K D D H D K M F K M S E K I L L L C V G B A G D T V O F A E Y I Q K N V O L Y K M R N G Y E L S P T A A

90 100 110 120 130 140 150  
 Tv\_beta\_4 A H S I R H T M A K A V R . K S P Y E V N M L L S G Y D G . . K P H L Y F M D Y L G T I Q S T P Y G A Q G Y C Q Y F V M S V F D K H Y K E G L T L E D G K S L M  
 Hs\_beta\_4 A N F T R R N L A D C L R S R T P Y H V N L L A G Y D E H E G P A L Y M D Y L A A L A K A P F A H G Y G A F L T L S L L D R Y Y T P T I S R S R A V E L L

160 170 180 190  
 Tv\_beta\_4 K L A L N Q I K Q R F T V A P H G F I V K L V D K N G I T K I D L E . . . . .  
 Hs\_beta\_4 R K C L E E L Q K R F I L N L P T F S V R I D K N G I H D L D N I S F P K Q G S

1 10 20 30 40 50 60 70 80  
 Tv\_beta\_5 T T L L S F I Y N G G I V V A D S R A T G G Q F I F S Q T V M K I L P L A N M I G T M A G G A A D C Q Y W L R N L S R L I Q L H K F R Y Q Q P L T V A A A S  
 Hs\_beta\_5 T T L L A K F R H G V I V A D S R A T A G A Y I A S Q T V R K V I E I N E Y L L G T M A G G A A D C S F W E R L A R Q C R I Y E L R N K E R I S V A A A S

90 100 110 120 130 140 150 160  
 Tv\_beta\_5 K I L V N E L Y R Y K G Y N L S H G S M I C G Y D N T G P H I F Y I D N H G S R I A C K R F S V G S G S T H A Y G V L D T C Y R E D M T K E E A C E L G R R A I  
 Hs\_beta\_5 K L L A N M V Y Q Y K G M G L S M G T M I C G W D K R C P G L Y Y V D S E G N R I S C A T F S V G S G S V Y A Y G V M D R G Y S Y D L E V E Q A Y D L A R R A I

170 180 190 200  
 Tv\_beta\_5 V H A T Y R D S G S G R V S V V H I T Q N G V E W I D K T D V F D M H D F S K T F .  
 Hs\_beta\_5 V Q A T Y R D A Y S G G A V N L Y H V R E D G W I R V S S D N V A D L H E K Y S G S T P

1 10 20 30 40 50 60  
 Tv\_beta\_6 . . . . . M E . G E F R E N K K G Q W S P Y E M H G C G T A I G C G D D Y V V I G A D T R L S V D Y S I D S R H K A R I F K M N S N C M I  
 Hs\_beta\_6 M L S S T A M Y S A P G R D L G M E P H R A A G P L Q L R F S P Y V F N G G T I L A G A G E D F A I V A S D T R L S E G F S I H T R D S F K C Y K L T D K T V I

70 80 90 100 110 120 130 140  
 Tv\_beta\_6 S A T G F D C D I D A F I T R M R S I L N Y E N Q H F H E M S V E S V A R C V S N T L Y S R R F P P Y Y I N I L V G G I N S E G K G K I Y G Y D P V C T I E D  
 Hs\_beta\_6 G C S G H C D C L L T L T K I E A R K M Y K H S N N K A M T G A I A A M L S T I L Y S R R F P P Y Y V Y N I I C G L D E E G K G A V S F D P V G S Y Q R

150 160 170 180 190 200 210 220  
 Tv\_beta\_6 L H Y D S N G S G S L A P L L D S A F G T I H H N T R P F P A V S I Q D A K N I V R D A I C S V T E R D I Y T G D A I Q L C V F T K D G F A Q E E F F I P R  
 Hs\_beta\_6 D S F K A G C S A S A M L Q P L L D N Q V G F K N M Q N V E H V P L S I D R A M R L V K D V F I S A A E R D V Y T G D A I R I C I V T R G I R E T V S L R K

Tv\_beta\_6 H  
 Hs\_beta\_6 D

1 10 20 30  
 Tv\_beta\_7 . . . . . M Q V I T A S G A I V A A K Y D G G I L L A S D L S I T Y G S M F R  
 Hs\_beta\_7 M E A F L G S R S G L W A G G P A P G Q F Y R I P S T P D S F M D P A S A L Y R G P I T R T Q N P M V T G T S V L G V K F E G G V V I A A D M L G S Y G S L A R

40 50 60 70 80 90 100 110  
 Tv\_beta\_7 H N N V S H F V E V A P N I I I G A S C E F A D F O T I E V I K S V I L Q Q C K H N G E Y L T A S E V H N Y I K R Y M Y C R S N M K P T S C K V I V A C I  
 Hs\_beta\_7 F R N I S R I M R V N N S T M E G A S C D Y A D F O Y I K O V L G Q M V I D E E L L G D C H S Y S F R A I H S W L T R A M Y S R S K M N P L W N T M V I G C .

120 130 140 150 160 170 180 190  
 Tv\_beta\_7 N P D G S K F T A C T D P Y C A S W E S D H T G T G F G K Y I Q G L Q I A D V V N G S F D . . . D V K K G I T E V F R A V N A N T T A N G K I E F I T V V P  
 Hs\_beta\_7 Y A D E S F T G Y V D M L G V A Y E A P S L A T G Y G A Y L A Q P L R E V L E K Q P V L S Q T E A R D L V E R C M R V L Y Y R D A R S Y N R F Q I A T V V E

200 210  
 Tv\_beta\_7 Q C I N H L A P E Q I D P N W E V V E G T W D Q .  
 Hs\_beta\_7 R G V E I E G L S T E T N W D I A H M I S G F E

e

1 10 20 30 40 50 60  
 Tv\_Ump-1 . . . . . M Y E Q W I P E P V V R I R E C L P N L R H G S V N O H P L E I A I E E R R K T Q F K D K F D E L A L L Y C E G F A N H E K  
 Hs\_Ump-1 M N A R G L G S E L K D S I P V T E L S A S G P F E S H D L R R C F S C V K N E L L P S H P L E L S E K N F O L N Q D K M N E S T L R N I Q C L F A P L K L Q

70 80 90 100 110 120  
 Tv\_Ump-1 M L V K L I K S T R T G F R T Y E R P D D A I P V F T C D I D V D N D M F A P N G M R A D I E F D P H E T Q E K R I N I E  
 Hs\_Ump-1 M E R K A . . V Q Q V Q R L P F L S S S N S L D V L R C N D E T I G E D I L N D P S Q . S E V M G E P H L M V E Y K I G L L





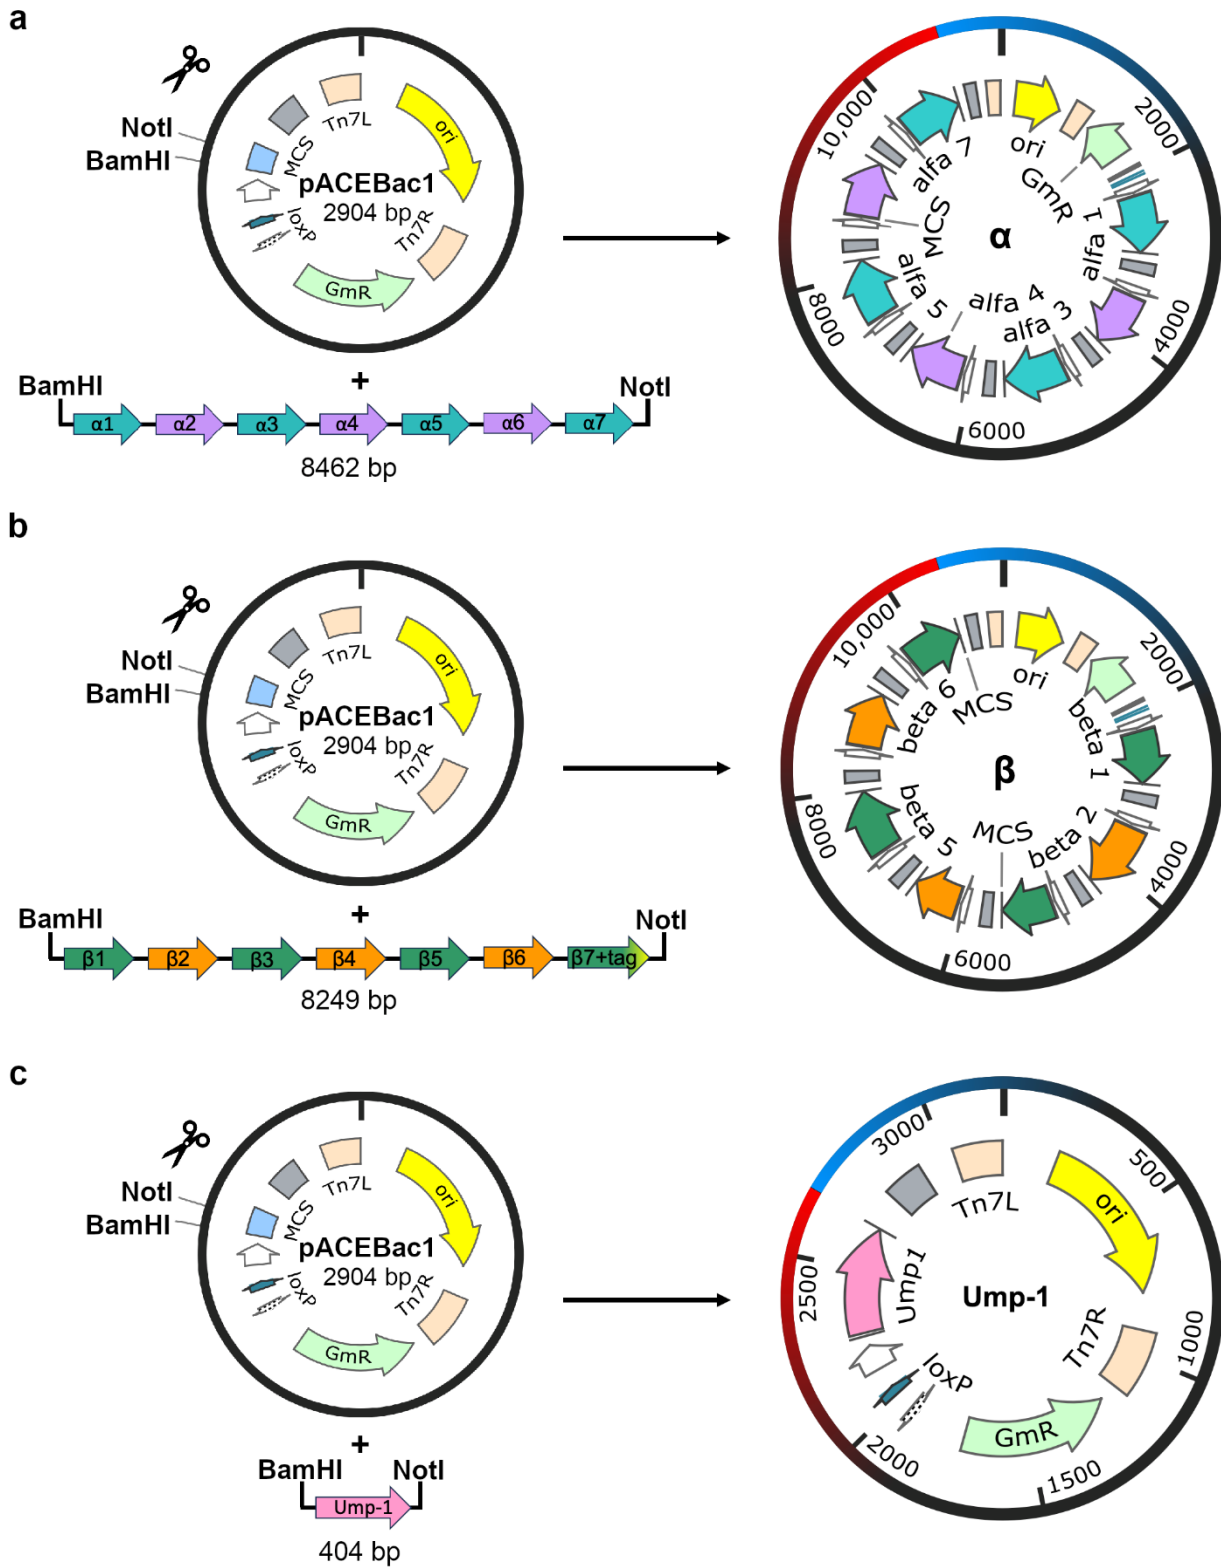

**d** *Insert BamHI\_α1\_α2\_α3\_α4\_α5\_α6\_α7\_NotI - sequences encoding Kozak sequence, start and stop codon, gene, polyhedrin promoter, SV40 polyA tail and twin-strep tag are highlighted.*

ggatcc**GCCACC**ATGAGCAGCGGTGCAGATCGTTATCTGACCGTTTTTGTAGTCCGAAGGTCGTCTGTGGCAGGTTGAATATAGTTTTAA  
 AGCAGTTAAACAGGCCGAAGTTACCGCAGTTGCAGTTAAAAGCAAAAATGCAGTTTGTGTTGCCGTGCAGAAAAAGGTTAGCGATAAAC  
 TGATTGATCCGAGCACCGTTACACACATGTATCGTATTACCGATAATGTTGGTGCATGTCTGGTTGGTCTGCCGAGTGATGTTAACTTT  
 ATTGTTATGCTGCTGCGTAGCTTTGCCAACAACTTTGAATATAAACAGGGCTTTAGCATCCCGGTTTCAATTCTGGCACAGATGCTGAG  
 CGAACGTCATCAGCTGGAAAGCCAGCTGGTTTTATGTTTCGTCCGAGCGCAGTTAGCGCAATTTCTGTTTGGTCTGGATGGTCCGAGCGATA  
 GCTTTGCACTGTATAAAATCGAACCGAGCGGTTATAGCAATGGTTTTTCGTGCAGTTGCATGTGGCGTTAAAGAAAATGAAGCAATGAGC  
 GCACTGGAAAAGAAGATGGAAGATTTGAAACACCCGGAAGCAACCGCAGAATTTACCCTGAGCACCCCTGCAAACCGTTTGTGGTGTGA  
 TTTTGAAGCACAGGATGTTGAAGTTAGCTGAGCCGCTGACCCGCTGATAATAGCAAATTTTCAAACCTGCAACAGCAAGGTAACGAAATTC  
 TGCATGCCGTTGCCGAAAAAGAT**TAA**AGATCTAGAGGATCATAATCAGCCATACCACATTTGTAGAGGTTTTACTTGCTTTAAAAAAC  
 TCCACACCTCCCCCTGAACCTGAAACATAAAATGAATGCAATTTGTTGTTTAACTTGTTTATTGCAGCTTATAATGGTTACAAATAA  
 AGCAATAGCATCACAATTTTCAAATAAAGCATTTTTTTTCACTGCATTCTAGTTGTGGTTTGTCCAAACTCATCAATGTATCTTATCA  
 TGCTCTGGATCTGATCACTGCTTGAAGCTAGAAAGTCCGGCTGCTAACAAAGCCCGAAAGGAAGCTGAGTTGGCTGCTGCCACCGCTGAG  
 CAATAACTATCATAACCCCTAGGGTATACCCATCTAAGGTAGCGAGTTAAACACTAGTATCGATTTCGCGACCTACTCCGGAATATTA  
 TAG**ATCATGGAGATAATTA**AAATGATAACCATCTCGCAAATAAATAAGTATTTTACTGTTTTCGTAAACAGTTTTGTAAATAAAAAACCT  
**ATAAAT**ATTTCCGGATTATTTACATACCGTCCCACCATCGGGCGCGAGCTC**GCCACC**ATGGCGATAGCGATTTTAGCCCTGACCACCTTTAG  
 CAGCGGTGGTAAACTGAATCAGATTGAAAGCGCACTGAAAGCAGTTAGCTTAGTTGGCCAGTGTGTTGGTGTAAAGCCAAAAATGGTG  
 CAGTTATTGCCGTGTAAGCAACCGAGCAGTCCGCTGGTTGAAAAAGTTACCAATCTGAAAGTGCAGAAAATCAACGATAATGTGGGC  
 ATTGTTTATAGCGGTGTGAACACCGATTTTTCAGTTATTCTGAAAAGCCTGCGTAAAGCCAGCATCAAATATAGCCTGCGTCTGGTGT  
 TGAAATGCCGACAGTGAAGTTGTTAAACATGCAGCACATAAGATGCAGTATTTATACCCAGATTGGTGGTGTTCGTCGGTTTTGGTGT  
 GCCTGCTGATTTATGGTTGGGAAGAAGCTGGTCCGACACTGTGGCAGGTGATCCGAGCGGCACCTTTTGGGCATGGAAAGCAACCCGCA  
 CTGGGTAAACCTAGTGTGATGGTAGCCGTACCTTTCTGGAAGCTGTTATAGCGAAGATCAGAGCGTTGATGCAATTCATACCCGCAAT  
 TAGCACCTTGAAAGAAGTTTTGACGGCCAGCTGACCCGAGAAGTGAATGAAATTTGGTGTGTTGATGAAACCCGTAAATTTTCGTACCC  
 TGAGCACCCGAGAAATCCGCGATTTTCTGACCGAAGTT**TAA**GAATTCAGAGGATCATAATCAGCCATACCACATTTGTAGAGGTTTTAC  
 TTGCTTTAAAAACCTCCACACCTCCCCCTGAACCTGAAACATAAAATGAATGCAATTTGTTGTTTAACTTGTTTATTGCAGCTTAT  
 AATGGTTACAAATAAAGCAATAGCATCACAATTTTCAAATAAAGCATTTTTTTTCACTGCATTCTAGTTGTGGTTTGTCCAAACTCAT  
 CAATGTATCTTATCATGTCTGGATCTGATCACTGCTTGAAGCTAGAAAGTCCGGCTGCTAACAAAGCCCGAAAGGAAGCTGAGTTGGCT  
 GCTGCCACCGCTGAGCAATAACTATCATAACCCCTAGGGTATACCCATCTAAGGTAGCGAGTTAAACACTAGTATCGATTTCGCGACCT  
 ACTCCGGAATATTAATAG**ATCATGGAGATAATTA**AAATGATAACCATCTCGCAAATAAATAAGTATTTTACTGTTTTCGTAAACAGTTTT  
**GTAATAAAAAAACCTATAAAT**ATTTCCGGATTATTTACATACCGTCCCACCATCGGGCGCCCGCG**GCCACC**ATGACCTATCGTTATGATGC  
 AGGCACCACCACCTTTAGCAGTATGGTTCGATTTCTGCAGGTTGAATATGCAATTCAGAGCATTAATCAGGCAGGCACCGCAATTTGGTG  
 TTCAGTTTACCAATGGTGTGTTCTGGCAGCCGAAAAGAAAAATACCGGTGCTGTTGGTTGATTACCTGTTTCTGAGAAAATGGCCAAA  
 ATTGATGGTCATATGTTACCGCAGTTGCAGGTTCTGACCGCAGATGCAAATACCCCTGGTTGATCTGATGCGTACCAGCGCACAGAAATA  
 TCTGAAAACCTATGATGAGCAGATGCCGGTTGAACAGCTGGTTCGTATGGTTGTGATGAAAACATAGCTATACCCAGTATGGTGGTCT  
 TCGCTCCGTATGGTTAGCTTTCTGATTGCAGTTATGATCGTCAAAAGGTTGTCAGCTGTATCTGACCGTACCGAGCGGTAATTTT  
 GGTGGTTGGAAAGCAACCCCATTTGGTGAATAATCAGACCCGACAGAGCATTTGAAAAGCCAGTATAAAGATATAATGACCGCAAC  
 CGAAGCAATGGATCTGACCGTTAAAGTTCTGTGTAACCCCTGGATAGCACCAGCCTGAGCGCAGATAAACTGGAATTTGCAGTTCTGC  
 AGTTTTCGCGAAGAAATATGGTCCGAAAGTGCATTTCTGACCACAGTGAAGTTGATACCCCTGATGAAACGTTATGAGGAAACCATTA  
 AAGTCAGCCGAGGAAAAAGAA**TAA**GGTACCAGAGGATCATAATCAGCCATACCACATTTGTAGAGGTTTTACTTGCTTTAAAAAACCTC  
 CCACACCTCCCCCTGAACCTGAAACATAAAATGAATGCAATTTGTTGTTTAACTTGTTTATTGCAGCTTATAATGGTTACAAATAAAG  
 CAATAGCATCACAATTTTCAAATAAAGCATTTTTTTTCACTGCATTCTAGTTGTGGTTTGTCCAAACTCATCAATGTATCTTATCATG  
 TCTGGATCTGATCACTGCTTGAAGCTAGAAAGTCCGGCTGCTAACAAAGCCCGAAAGGAAGCTGAGTTGGCTGCTGCCACCGCTGAGCA  
 ATAACTATCATAACCCCTAGGGTATACCCATCTAAGGTAGCGAGTTTAAACACTAGTATCGATTTCGCGACCTACTCCGGAATATTAATA  
**GATCATGGAGATAATTA**AAATGATAACCATCTCGCAAATAAATAAGTATTTTACTGTTTTCGTAAACAGTTTTGTAATAAAAAAACCTAT  
**AAAT**ATTTCCGGATTATTTACATACCGTCCCACCATCGGGCGCCTCGAG**GCCACC**ATGAGCGATTATACCCGTAGCATTACCCGTTTTAGTC  
 CGGATGGTCTGCTGTTTTCAGATTGATCATGCACATGCAGCAGTTTCAGCGTGGCACCACCGTTGTTGCAACCCGTAGTAAAGATATGATT  
 GTTATTGCCGTTGAGAAAACCGCAGTTGCAAACTGCAAGATCCCGCATACCTTTAGCAAATTTGTAGCCTGGATAAACATGTGATGTG  
 TGCATTTGCAGGTTGCAATCCGATGCACGTCGCCCTGATTTCAGCGGCTCAGCGTCAAGCTGAGCAGCTGAGCCTGACCTATGAAGATC  
 CGATTAGCATTTGAAAACATTTGCCGCTATATTTGCAACCCCTGCAACTGAAAAATACCCAGAGCGTGGTGCACGCTGACCTATGGTTTAGC  
 ACCCTGATTTGTGGTTTTGATGATATGACAGCCAGCCGATATTTATGAAACCCCTGCCGAGCGGCACCTATGCAGAAATGGAAAGCAGC  
 TACCATTGGTTCGTCATGATCAGACCGTTATGGAAATCTGGAAAAACCTACAAAGACGATATGACCGATGAAGAAGCACAGAACTGG  
 CAATTTGGTGCATGCTGGAAGTTGTTGAAAATGGTAGCAAAAATCTGGAAGTGGCTATATGAAACGTTGGTGGTACAATGGAAATATG  
 GCCGAAGAGGTTCTGGATGCACTGATTGAAAGCACCAAGCAAAA**TAA**ACGCGTAGAGGATCATAATCAGCCATACCACATTTGTAGAG  
 GTTTTACTTGCTTTAAAAAACCTCCACACCTCCCCCTGAACCTGAAACATAAAATGAATGCAATTTGTTGTTTAACTTGTTTATTGTC  
 AGCTTATAATGGTTACAAATAAAGCAATAGCATCACAATTTTCAAATAAAGCATTTTTTTTCACTGCATTCTAGTTGTGGTTTGTCCA  
 AACTCATCAATGTATCTTATCATGTCTGGATCTGATCACTGCTTGAAGCTAGAAAGTCCGGCTGCTAACAAAGCCCGAAAGGAAGCTGA  
 GTTGGCTGCTGCCACCGCTGAGCAATAACTATCATAACCCCTAGGGTATACCCATCTAAGGTAGCGAGTTTAAACACTAGTATCGATTTC  
 GCGACCTACTCCGGAATATTAATAG**ATCATGGAGATAATTA**AAATGATAACCATCTCGCAAATAAATAAGTATTTTACTGTTTTCGTAA  
**CAGTTTTGTAATAAAAAAACCTATAAAT**ATTTCCGGATTATTTACATACCGTCCCACCATCGGGCGCAAGCTT**GCCACC**ATGTTTAAATAGCG  
 GCAGCGAATATGATCGCAATGTGAATACCTTTAGTCCGGATGGTCTGCTGCAAGTTGAATATGCAATTTGAAGCAGTTAACTGGGT  
 AGCAGCGCAGTTGCAATCTGTGTCGGAAGGTGTTATTTTGCAGTTGAAAACGCTGAGCAGCCAGCTGCTGATGCAAGCAGCGT  
 TGAAAAAGTTTTATGCCATCGATGATCATGTTGGTGTGTTTATGACAGGCTGGCAGCAGATGGTTCGATACAATGGTTGAACACATGCCGT  
 TTGAAGCACAGAATCATCGTTTTAGCTTTGATGAACCGATTGGCATTAAGCAGTTACCCAGAGCGTTTGTGATCTGGCACTGGCATTT  
 GGTGAAGGTCGTCGTAAGAAAGGTGATGGTCAGATGAGCCGTCGTTTGGCACCAGCTGCTGGTTGCAGGTATTGAAAATGGTAAATG  
 TCACCTGTTTACATACCGATCCGAGCGGCACCTATACCGAATGTGCTGCACGTCGCATTGGTGGTGGTAGCGAAGGTCCGAAGCACTGC  
 TGCGTGATCTGTATAAAGATGTTATGACCCCTGCATGAAGCAGAGGATCTGGCCCTGAGCACCCCTGCGTCAGGTTATTCAAGAAAACTG  
 AATGAGAACAATGTGGAAGTTGCATGTGCACGTTAGCACCGGTAATTTGAAATCTATACCAGCGAACAGCGCCAAGAAATTTGTTGC  
 CCGTCTGCCCTCCGCTATTATTTCCGGA**TAA**GTGACAGAGGATCATAATCAGCCATACCACATTTGTAGAGGTTTTACTTGCTTTAA  
 AAACCTCCACACCTCCCCCTGAACCTGAAACATAAAATGAATGCAATTTGTTGTTTAACTTGTTTATTGCAGCTTATAATGGTTACAA



AATAAAGCAATAGCATCACAAATTTACAAATAAAGCATTTTTTTCACTGCATTCTAGTTGTGGTTTGTCCAAACTCATCAATGTATCT  
 TATCATGTCTGGATCTGATCACTGCTTGAGCCTAGAAGATCCGGCTGCTAACAAAGCCCGAAAGGAAGCTGAGTTGGCTGCTGCCACCG  
 CTGAGCAATAACTATCATAAACCCTAGGGTATACCCATCTAAGGTAGCGAGTTTAAACACTAGTATCGATTTCGCGACCTACTCCGGAAT  
 ATTAATAGATCATGGAGATAAATTAATAATGATAACCATCTCGCAAATAAATAAGTATTTTACTGTTTTTCGTAACAGTTTTGTAAATAAAAA  
**AACCTATAAAT**ATTCGGATTATTCATACCGTCCCACCATCGGGCGCCCGGG**GCCACCATG**TCCGCGCAAAATATGATGAAAATGCC  
 ACCACCTTTAGTCCGGAAGGTGCTATTCTGCAAGTTGAAAATGCAATGAAAGCAGTTCAGCAGGGTATGCCGACCGTTGGTCTGAAAAG  
 CAAAACCCATGCAGTTATTGCCGGTGTATGCATAGCCCGAGCGAATTTAGCAGCCATCAGCCGAAAATCTTTAAATCGATCAGCATA  
 TTGGTGTGGCAATTAGCGGTCTGACCGCAGATGGTCTGGTCTGTGTAATTTCTGCGTAATGAATGTCTGCATCACACCTTTTGT  
 GGCACCGAAATCGTGTTCGGATCTGGCAGATACCGTTGCATGCAAGCCAGAAAAGACCAGCAAAGTTGGTAAACGTCGGTATGG  
 TGTGGTCTGCTGATGATTGGTGCGGGTGTGATGGTCCCGCTGTGTTGAAACCTGTCCGAGCGGTGAGCATTGGGAATATAAATGCAC  
 AGGCAATTGGTCTGCTGCCAGGCAGCAAAAACCTATCTGGAACCAATCTGAATGAATTTCCGGATTGTACCGGTGATCAACTGATT  
 CGTCATGCACGCTGCATGAATGATTGTAAGCCGTGAAAGCGATAGCCTGGAAGCAATTGCACTGGGTGTTGTTGGTATTGATGA  
 ACCGTTTACCATTCTGGAAGTCCGGAATTACAGAAATATATCGAT**TAA**AGGCCTAGAGGATCATAATCAGCCATACCACATTTGTAGA  
 GGTTTTACTTGTCTTAAAAAACCTCCCACACCTCCCCCTGAACCTGAAAACATAAAATGAATGCAATTGTTGTTGTTAACTTGTATTATG  
 CAGCTTATAATGGTTACAAATAAAGCAATAGCATCACAAATTTACAAATAAAGCATTTTTTTCACTGCATTCTAGTTGTGGTTTGTGCC  
 AAACCTCATCAATGTATCTTATCATGTCTGGATCTGATCACTGCTTGAGCCTAGAAGATCCGGCTGCTAACAAAGCCGAAAGGAAGCTG  
 AGTTGGCTGCTGCCACCGCTGAGCAATAACTATCATAAACCCTAGGGTATACCCATCTAAGGTAGCGAGTTTAAACACTAGTATCGATT  
 CGCGACCTACTCCGGAATATTAATAGATCATGGAGATAAATTAATAATGATAACCATCTCGCAAATAAATAAGTATTTTACTGTTTTTCGTA  
**ACAGTTTTGTAAATAAAAAAACCTATAAAT**ATTCGGATTATTCATACCGTCCCACCATCGGGCGCATATG**GCCACCATG**AGCGGGTGA  
 GGTAGCGGTTATGATTTTAACTCCGATTACCTTTAGTCCGGATGGTCTGATGTTTACAGTTGAATATGCAACCAAGCCGTTGAAAAAGA  
 TAGCCTGGCACTGGGTGTTAAATGCAAAAGATGGTATTCTGCTGGCAGCCGAGAAAAATCTGACCAGCACACTGCTGACCCCTGGTGGTA  
 ATCCGCTATCTTTGGATTAAATGATAGCATTGCATGGCCACCATTGGTCTGATCGTCCGATTGTTATAGCATGTTGAACAGAGCCGCT  
 AATCGTGCAGAAACCTTTACCAGCAATTTTGGCATCAAAATTTACCGTTCCGCGAGCTGGCAAGCGAAGTTAGCCAGCAGTTTTCATCTGCC  
 ACATTATTATCAGGCATATCGTCCGTTTGGTGTACCGTTATTTTGGCAGCTATAAAGATGATGCCCTGTATGCAATTGAACCGAGCG  
 GTGCCCTTTATGGTTATTTTGAAGCTGCTTTGGCAAGAATAGCAATCTGGCAGCTGCAGAATTACAGAAAACCGAATGGAAAAATATC  
 ACCGTTTCGTGAAAGCAGTTCCGGAAGTGCAGCTATTATCAAAGCCTGCATGAAAGCCAGTTTAAAAAGTGGGAAATCGAAATGTTTGG  
 GCTGTGCGAAGAAACCAATGGTCTGCCGAGAAAGTCCGGAAGATGTTTTTCAGAGCCGTTTTGTAAATGAAAACCCGCGAGAAT**TAAg**  
*cgggcgc*

*Insert BamHI β1\_β2\_β3\_β4\_β5\_β6\_β7+tag\_ NotI - sequences encoding Kozak sequence, start and stop codon, gene, polyhedrin promoter, SV40 polyA tail and twin-strep tag, are highlighted.*

*ggatcc***GCCACCATG**AGCGGAATATCAGTTTCCGAAAGAAAGCATGGGTACAACCCCTGCTGGCAATTCAGTGTACCAGATGGTGTGTTAT  
 GGCAAGCGTAGCCGTACAGCAGCAGCGTAGCTTATTTCCGAATCGTGAACCAACAAATTTACCGAAATTCAGCCGAAAATCTTTGCAG  
 CAGTGTGGTAAATTCAGCAGATACCCAGTTCTGGCAGTGCAGTTAAAACATCTGAATGCATGAACATCACCCGTGAAAATACC  
 GATGATAGCACCATTCTGGTTGCCAGCAATGTTATTCGTAGCCTGATTGTTTCGTTATCGTCAGTATCTGAGTGCAGGTTGTTATGTTGG  
 TGGTGGGATAGCGCAGGTCCGAGGTTTATAGCATTGAAGTTAGCGGTATGGCCATCAAAAAGAAAATGCAAGCAATGGTAGCGGCA  
 GCACCTATATCAGGCATATATGATCAGAATATCGCGAGGATATGACAATGGAAGAAGCAACCAATTTGCAATTCGCCGAGTTACC  
 GGTGCAATTTATCGTGTAGGTAGCAGCGGTGGTGTGTTGTAATATGTTTCAGATTAAATGCAGATGGTGCCAAACGTTATGACCGTTCTGTC  
 GGCACAGCAGCCGTTAACTATGATATTGTTAAAGGTTAAAGATCTAGAGGATCATAATCAGCCATACCACATTTGTAGAGGTTTACT  
 TGCTTTAAAAACCTCCCACACCTCCCCCTGAACCTGAAAACATAAAATGAATGCAATTGTTGTTGTTAACTGTTTATTGCAGCTTATA  
 ATGGTTACAAATAAAGCAATAGCATCACAAATTTACAAATAAAGCATTTTTTTCACTGCATTCTAGTTGTGGTTTTGTCCAAACATC  
**AATGTATCTTATCATGTCTGGATC**TGATCACTGCTTGAGCCTAGAAGATCCGGCTGCTAACAAAGCCCGAAAGGAAGCTGAGTTGGCTG  
 CTGCCACCGCTGAGCAATAACTATCATAAACCCTAGGGTATACCCATCTAAGGTAGCGAGTTTAAACACTAGTATCGATTTCGCGACCTA  
 CTCCGGAATATTAATAGATCATGGAGATAAATTAATAATGATAACCATCTCGCAAATAAATAAGTATTTTACTGTTTTTCGTAACAGTTTTG  
**TAATAAAAAAACCTATAAAT**ATTCGGATTATTCATACCGTCCCACCATCGGGCGCGAGCTC**GCCACCATG**GAAGCAGGTCTGGGTTTT  
 GATTTTAGCAATTTAGCCGTAACAAAGCCCTGGAACCCGAACTGGGTAACCCGAGCTGCTGAGCACCAGCACCACCATTCAGCAGC  
 AATTTTTGATGTTGGTGTGTTCTGGTGCAGATACCCGTCGCAACCCGAGGTCGATTGTTGCAGTTAAAGATGAAATGAAACTGCAT  
 ACATCAGCGATAACATTTGGTTTTGTTGGTGCAGGTATTGCAGCCGATAATGATAACATTAATGCAGTGATTAGCGCAAACTGCGCTG  
 TTTAGATGAATACCGGTCTGCAACCGCTGTTGATCAGTGTACCAATATTCTGGCAAGTTCGCTGTTTTCAGTATATGGGTTATATTCA  
 GGCAGCAGTATGTTGGTGGTATTGATTTTTCAGGGTCCGAGGTTTATCAGGTTGCACCGCATGGTAGCTTTAGCAAACAGCCGTTTA  
 TTGCACAAGGTAGCGGTAGCCTGGCAGCAATTAGCGTTCTGGAATAATCGTTGGCATAACAAAATGAACGAACACGACTGTATGGAATG  
 GTTGCAGATGCAATTTATGCCGTTATTACCAATGATTTAGGTTTCAGGTAGCCATGTTAATCTGTGCGTGATTAAACGTGAAAACCCGGA  
 AGATAAACAGAGCAAAGTGTCTACACCTTCTATAAAGATTTACCGGTGCCGATGAAAACGATCGTAATTTTCTGCTGGAACCCGAGA  
 TCAATAACATTTGATGTGGAAGTATTAAAACCCAGCAGCTCCGCTGACACTGCCGATGTTTCATCTGGAATTTGGATGATGCACCG  
 GCAT**TAA**GAATTCAGAGGATCATAATCAGCCATACCACATTTGTAGAGGTTTTACTTGTCTTAAAAAACCTCCCACACCTCCCCCTGAAC  
 CTGAAAACATAAAATGAATGCAATTGTTGTTGTTAACTGTTTATTGCAGCTTATAATGGTTACAAATAAAGCAATAGCATCACAAATTT  
**CACAAATAAAGCATTTTTTTCACTGCATTCTAGTTGTGGTTTTGTCCAAACCTCATCAATGTATCTTATCATGTCTGGATC**TGATCACTGC  
 TTGAGCCTAGAAGATCCGGCTGCTAACAAAGCCCGAAAGGAAGCTGAGTTGGCTGCTGCCACCGCTGAGCAATAACTATCATAAACCCT  
 AGGGTATACCCATCTAAGGTAGCGAGTTTAAACACTAGTATCGATTTCGCGACCTACTCCGGAATATTAATAGATCATGGAGATAATTA  
**AATGATAACCATCTCGCAAATAAATAAGTATTTTACTGTTTTTCGTAACAGTTTTGTAATAAAAAAACCTATAAAT**ATTCGGATTATTC  
 ATACCGTCCCACCATCGGGCGCCCGGG**GCCACCATG**AGCGGATATCAGACCTTAAATGGTAGCTGTTCTGGCAATGGCAGGCGATC  
 ATTGTGTTGCAATTTGCCAGCGATCGTCTGCTGGTGTAAATATGCTGACCGTTAGCAAAGATTTCAAACGCATCTTTCAGATCAACGAC  
 CGCATTTATCTGGGTTTAGCAGGTCTGGCAACCGATGTTCTGACCGTTCTGTAACAGCTGCGTTTTGATGTTAATCTGCTGGAACCTGCC  
 TGAAGAAGCTCCGATTGATCCGAAAAGTTTTATGAATCTGGTTAAAAGCACCCTGTACGAAAACGCTTTAGCCCGTCTTTGTTTACAC  
 CGGTTATTGCAGGTCTGCTGCCGAAAACCAATGAACCGTATCTGGCAGCAAGCGATAGCATTGGTGCATTTGCATTTCCGAAAGATTTT  
 GCAGTTGCAAGCAGCTGTGAAGAAAGCCTGTATGGTATTGTTGAAAGCGCATGGCGTCCGAATATGAATCCGGATGAACCTGTTGAAATG  
 TACCGCCAAATGCTGATGAGCAGCTTGAACGTGATAGCATGACCGTTGGGTTGGTATTGTTTATATCATCACCCAGGATAAAGTGA  
 TCATCAAAGAAATCAAACCCGATGGATT**TAA**GGTACCAGAGGATCATAATCAGCCATACCACATTTGTAGAGGTTTTACTTGTCTTAA  
 AAAACCTCCCACACCTCCCCCTGAACCTGAAAACATAAAATGAATGCAATTGTTGTTGTTAACTGTTTATTGCAGCTTATAATGGTTAC  
**AAATAAAGCAATAGCATCACAAATTTACAAATAAAGCATTTTTTTCACTGCATTCTAGTTGTGGTTTTGTCCAAACCTCATCAATGTATC**

**TTATCATGCTGGATC**TGATCACTGCTTGAGCCTAGAAGATCCGGCTGCTAACAAAGCCCGAAAGGAAGCTGAGTTGGCTGCTGCCACC  
 GCTGAGCAATAACTATCATAACCCCTAGGGTATACCCATCTAAGGTAGCGAGTTTAAACACTAGTATCGATTCCGACCTACTCCGGAA  
 TATTAATAG**ATCATGGAGATAAATAAAATGATAACCATCTCGCAAATAAATAAGTATTTTACTGTTTTCGTAACAGTTTTGTAATAAAA**  
**AAACCTATAAAT**ATTCCGGATTATTCATACCGTCCCACCATCGGGCGCCTCGAG**GCCACCATGCTGAGCATTGTTGGTCTGCAAGGTCC**  
**GGATTGGGTTCTGATTGCAGCAGATAGCAGCGTTAGCAGCAGCATTATTTGTATGAGCGAAAACCTATGATCGTATCGCACAGCTGGATG**  
**ATCGTTCATGCCTGGCAATGAGCGGTGAAACCGGTGATTGTCTGCAACTGAGCGAATATTTACAGGGTAATGTTGCCCTGTACAAATTT**  
**CGTAATGGTGTGAAGTGAAGTATGATGCCCTGGCACATTTTATCGTTCATACATGGCAAAGCCGTTTCGTAAAAGCCCGTATGAAGT**  
**TAATATGCTGCTGAGCGGTTATGATGGTAAACCCGACTCTGTATTTTCATGGATTATCTGGGCACCCCTGCAAAGCATTCCGTATGGTGCAC**  
**AGGTTATTGTGAGTATTTTGTGATGAGCGTGTTCGATAAGCACTATAAAGAAGGCTGACCCCTGGAAGATGGTAAAGAAGCTGATGAAA**  
**CTGGCACTGAACAGATTAACAGCGTTTTTACCCTGTCACCCGATGGCTTTTATGTAAACTGGTGGATAAAAAACGGCATCACCAAAT**  
**CGATCTGGAATAAACGCGTAGAGGATCATAATCAGCCATACCACATTTGTAGAGGTTTTACTTGCCTTAAAAAACCTCCCACACCTCCC**  
**CCTGAACCTGAAACATAAAATGAATGCAATTGTTGTTGTTAACTTGTATTATGTCAGCTTATAATGGTTACAAATAAAGCAATAGCATCA**  
**CAAATTTACAAATAAAGCATTTTTTTACTGCACTTAGTTGTTGTTGTTCCAAACTCATCAATGATCTTATCATGCTGGATC**TGA  
 TCACTGCTTGAGCCTAGAAGATCCGGCTGCTAACAAAGCCCGAAAGGAAGCTGAGTTGGCTGCTGCCACCCTGAGCAATAACTATCAT  
 AACCCCTAGGGTATACCCATCTAAGGTAGCGAGTTTAAACACTAGTATCGATTCCGACCTACTCCGGAATATTAATAG**ATCATGGAGATA**  
**TAATAAAATGATAACCATCTCGCAAATAAATAAGTATTTTACTGTTTTCGTAACAGTTTTGTAATAAAAAAACCTATAAAT**ATTCCGG  
 ATTATTTCATACCGTCCCACCATCGGGCGCAAGCTT**GCCACCATG**CAGAGCCTGTATCTGAAACCGCGTGAAGTTGAAAGCGAAGAA  
**ACCACCAAGCACTGGAACCGGCACATGTTCCAGATCCGTGTCAGTTTGTAAAAACCATATTAGCCTGAGCTATACCAACGAACCGGG**  
**TAAATGGCAGCAGTTCATGGCACCACCACACTGAGCTTTATCTATAATGGTGGTATTGTTGTTGCCGTTGATAGCCGTGCAACCGGTG**  
**GTCAGTTTTATCTTTAGCCAGACCGTTATGAAAATCTGCCGCTGGCACCGAATATGATTGGTACAAATGGCAGGCGGTGCAGCAGATTGT**  
**CAGTATTGGCTGCGTAATCTGAGCCGCTGATTTCAGCTGCATAAATTTGTTATCAGCAGCCGCTGACCGTTGCAGCAGCAAGCAAAAT**  
**TCTGGTTAATGAAGTGTATGCTACAAGGGCTATAATCTGAGTATTGGTAGCATGATTGCGGCTATGATAAATCCGGTCCGCACATCT**  
**TTTATATCGATAATCATGGTAGCCGATTCGCCGTAACCGTTTTAGCGTTGGTAGCGGTAGCACCCTAGCCTATGGTGTCTGGATACC**  
**TGTTATCGTGAAGATATGACCAAGAAGAAGCCTGCGAAGTGGTTCGTCGTCGTCATTTATCATGCAACCTATCGTATAGCGGTAGTGG**  
**TGGTTCGTTAGCGTTGTTTCATATTACCCAGAATGGTGTGGAATGGATCGATAAAACCGATGTGTTTATGATATGCACGACTTTAGCAAAA**  
**CCACCTTTTAA**GTCGACAGAGGATCATAATCAGCCATACCACATTTGTAGAGGTTTTACTTGCCTTAAAAAACCTCCCACACCTCCCC  
 TGAACCTGAAACATAAAATGAATGCAATTGTTGTTGTTAACTTGTATTATGTCAGCTTATAATGGTTACAAATAAAGCAATAGCAT**CACA**  
**AATTTACAAATAAAGCATTTTTTTACTGCACTTAGTTGTTGTTGTTCCAAACTCATCAATGATCTTATCATGCTGGATC**TGATC  
 ACTGCTTGAGCCTAGAAGATCCGGCTGCTAACAAAGCCCGAAAGGAAGCTGAGTTGGCTGCTGCCACCCTGAGCAATAACTATCATAA  
 CCCCTAGGGTATACCCATCTAAGGTAGCGAGTTTAAACACTAGTATCGATTCCGACCTACTCCGGAATATTAATAG**ATCATGGAGATA**  
**ATTAATAATGATAACCATCTCGCAAATAAATAAGTATTTTACTGTTTTCGTAACAGTTTTGTAATAAAAAAACCTATAAAT**ATTCCGGAT  
 TATTTCATACCGTCCCACCATCGGGCGCCCCGG**GCCACCATG**GAAAGGTGAATTTCCGCGAGAATAAGAAAGGTGAGTGGTCCACCGTATGA  
**AATGCATGGTGGCACCGCAATTTGGTATTTGTGGTGTATGATTGTTGTTGATTGGTGCAGATACCCGCTGAGCGTTGATTATAGCATTG**  
**ATAGCCGTCATAAAGCCCGTATCTTTAAGATGAATAGCAACTGTATGATTAGCGCCACCGGTTTTGATGGTGTATTTGATGCATTTATT**  
**ACCCGCATCGGTAGCATTCTGTAATATGAAAACAGCAGCTTTCACGAAATGAGCGTGGAAAGCGTTGCACGTTGTTGTTAGCAATAC**  
**CCTGTATAGCAAACGTTTTCTCCGTACTATAACAACACTTCTGTTGGTGGCATTAAACAGCAAGGTAAGGTAAGGTAAGGTAAGGTTATG**  
**ATCCGTTGGCACCATGAGGATCTGCATTATGATAGCAATGGTAGCGGTAGCAGCCTGGCAGCACCGCTGCTGGATAGCGCATTTGGT**  
**ACAATTCATCATAATACCCGTCGTTTCCGGCAGTTTCACTGCAAGATGCCAAAAACATTGTTGCTGATGCAATTTGTAGCGTTACCGA**  
**ACGTGATATCTATACCCGTTGATGCACTGCAACTGTGTGTTTTTACCAAAGATGGTTTTTGCCTAAGAAAGATTTCCGCTGCCTCGTCAAT**  
**AA**AGGCCTAGAGGATCATAATCAGCCATACCACATTTGTAGAGGTTTTACTTGCCTTAAAAAACCTCCCACACCTCCCCCTGAACCTGA  
 AACATAAAATGAATGCAATTGTTGTTGTTAACTTGTATTATGTCAGCTTATAATGGTTACAAATAAAGCAATAGCAT**CACA**AATTT**CACA**  
**AATAAAGCATTTTTTTACTGCACTTAGTTGTTGTTGTTCCAAACTCATCAATGATCTTATCATGCTGGATC**TGATCAGCTTGA  
 CCCTAGAAGATCCGGCTGCTAACAAAGCCCGAAAGGAAGCTGAGTTGGCTGCTGCCACCCTGAGCAATAACTATGAAACCCCTAGGG  
 TATACCCATCTAAGGTAGCGAGTTTAAACACTAGTATCGATTCCGACCTACTCCGGAATATTAATAG**ATCATGGAGATAAATAAATG**  
**ATAACCATCTCGCAAATAAATAAGTATTTTACTGTTTTCGTAACAGTTTTGTAATAAAAAAACCTATAAAT**ATTCCGGATTATTCATAC  
 CGTCCCACCATCGGGCGCCATATG**GCCACCATG**CAGGTTATTACCGCAAGCGGTGCAATTTGTTGCAGCAAAATATGATGGTGGTATTTCT  
**GCTGGCAAGCGATCTGAGCATTACCTATGGTAGCATGTTTCGCCATAATAACGTTAGCCATTTGTTGAAGTTGCACCGAACATTTATTA**  
**TCGGTTCAGCCGGTGAATTTGCAGATTTTCAGACCTGATGAAAGTGAAGTGAATCAAAAGCGTTATTCTGCAGCAGCAGTGAACATAATGGT**  
**GAATATCTGACCCGCAAGGATGCAATAATTACATTAACGCTATATGATCATGCTGCCGCAAGATATGAAACCGCTGAGCTGTAAGT**  
**TATTGTGGCAGGTATTAATCCGGATGGCAGCAAAATTTCTGGCATGTACCGATCCGTATGGTGCAGCTGGGAAAGCGATCACATTGGCA**  
**CCGTTTTTGGTAAATATCTGCAGGCTGTCAGATTGCCGATGTTGTTAATGGTAGCTTTGATGATGTGAAAAAGGGCATCACCGAAGTT**  
**TTTCGTGCAGTTAATGCCGTAATACCACCGCAATGGTAAAATCGAATTTATACCGTTACACCGCAGGGCATTAAATCATCTGGCACC**  
**GGAAACAAATGATCCGAATTGGGAAGTTGTTGAAGGCACCTGGGATCAGAGCGCTTGGAGCCACCCGCACTCGAAAAAGGTGGAGGTT**  
**CTGGCGGTGGATCGGGAGGTTACAGCGTGGAGCCACCCGCACTCGAGAAA****TAA***gcggccgc*

*Insert BamHI\_Ump-1\_NotI*

*ggatcc***GCCACCATG**TACGAACAGTGGATTCCGGAAGAACCAGTTGATCGTCTGCGTGAAGGCTGCCGAATCTGCGTTCATGGTAGCGT  
**TAATCAGCATCCGCTGGAATTTGCCATTGAAGAACGCTGTAACCCAGTTCAAAGCAAAATTTGATGAAGTGGCAGTCTGATGGTG**  
**AAGGTTTTGCAATCAGATGAGAAGTCTGTACAACTGATTAAGACACCCCGTATGGTTTTTCGACCTATGAACGTCGGGATGATCTG**  
**GCAATTTGAAGTTTTTACCCTGATATCGATGTGTTGATTTCAACGATATGTTTTGCCACCGAATGGTATGCGTCCGATATTTGA**  
**TCCGATGAAATCCAAGAGAAACGCTGAATATTGAATAA***gcggccgc*

**Supplementary Figure 2. Cloning plasmids and proteasome gene sequences. a-c)** Schematic representation of the cloning of the three plasmids used to generate recombinant baculoviruses. The figure was created using SnapGene® (snapgene.com). **d)** The inserted DNA sequences correspond to the seven Tv20S α subunits (BamHI\_α1\_α2\_α3\_α4\_α5\_α6\_α7\_NotI), seven Tv20S β subunits (BamHI\_β1\_β2\_β3\_β4\_β5\_β6\_β7+tag\_NotI) and Tv20S Ump-1 (BamHI\_Ump-1\_NotI). The accession numbers for each subunit are listed in Supplementary Table 3. Sequences are labelled as follow: *restriction enzyme cleavage site*, **Kozak sequence**, **start** and **stop** codon, *gene*, **polyhedrin promoter**, SV40 polyA tail, **twin-strep tag**.

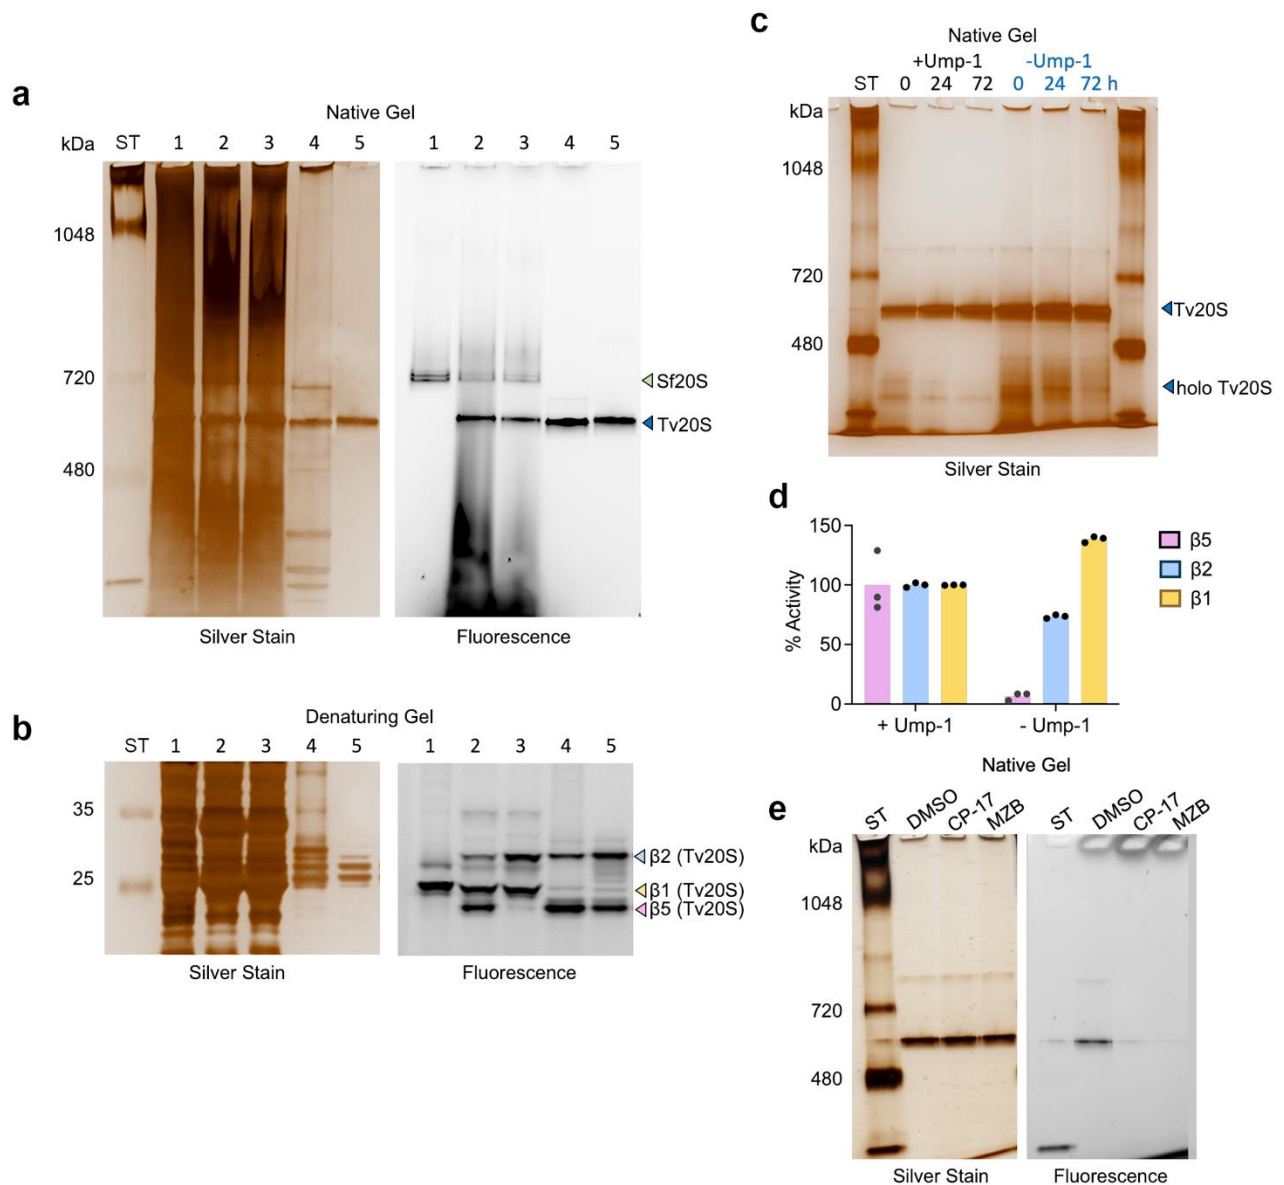

**Supplementary Figure 3. Confirmation of recombinant Ump-1 function and 20S stability.** Panel **a**) shows a native protein gel demonstrating Me4BodipyFL-Ahx3Leu3VS probe labelling of the proteasome. The left panel is a silver-stained gel, while the right panel is a fluorescent scan of the same gel at 470 nm excitation and 530 nm emission. Panel **b**) displays a denaturing gel with the same protein samples as panel **a** lane 1 represents Sf9 cell lysate, lane 2 represents Sf9 cell lysate infected with alpha, beta, and Ump-1 baculovirus, lane 3 represents Sf9 cell lysate infected with alpha and beta baculovirus, lane 4 represents native Tv20S, and lane 5 represents purified rTv20S. Panel **c**) shows the time-dependent assembly of the 20S proteasome in the presence and absence of Ump-1, while panel **d**) shows the enzymatic activity of rTv20S in the presence and absence of Ump-1. Assays were performed in technical replicates (n=3). **e**) Silver-stained gel showing the mass of rTv20S is unaltered in the presence of inhibitors while the fluorescent gel shows that reduced labelling of the active sites. All gels were repeated independently two times with similar results. ‘ST’ stands for the molecular weight ladder.

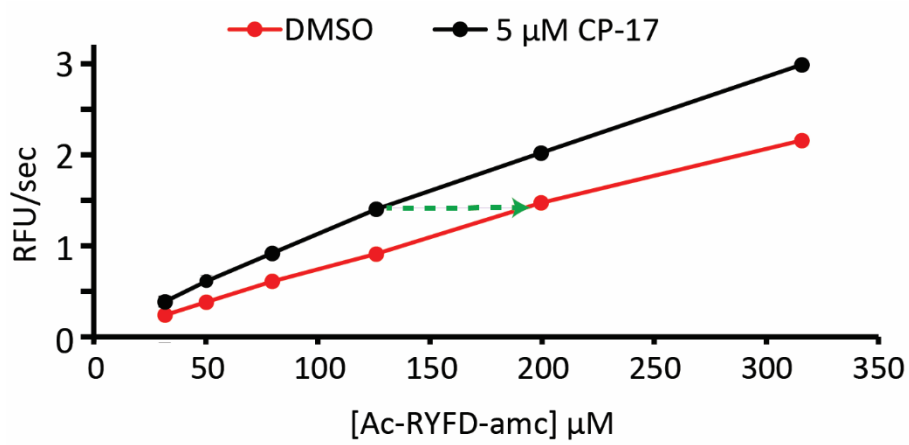

**Supplementary Figure 4. Activation of  $\beta 1$  in the presence of CP-17.** *rTv20S* was preincubated with 5  $\mu\text{M}$  of CP-17 to inactivate  $\beta 5$  only and then assayed with Ac-RYFD-amc. Activity was compared to a vehicle control. Assays were performed in triplicate, with each dot representing the mean of 3 technical replicates. The green arrow shows an example of the apparent increase in substrate concentration (from 126  $\mu\text{M}$  to 200  $\mu\text{M}$ ) within the proteasome core in the presence of CP-17.



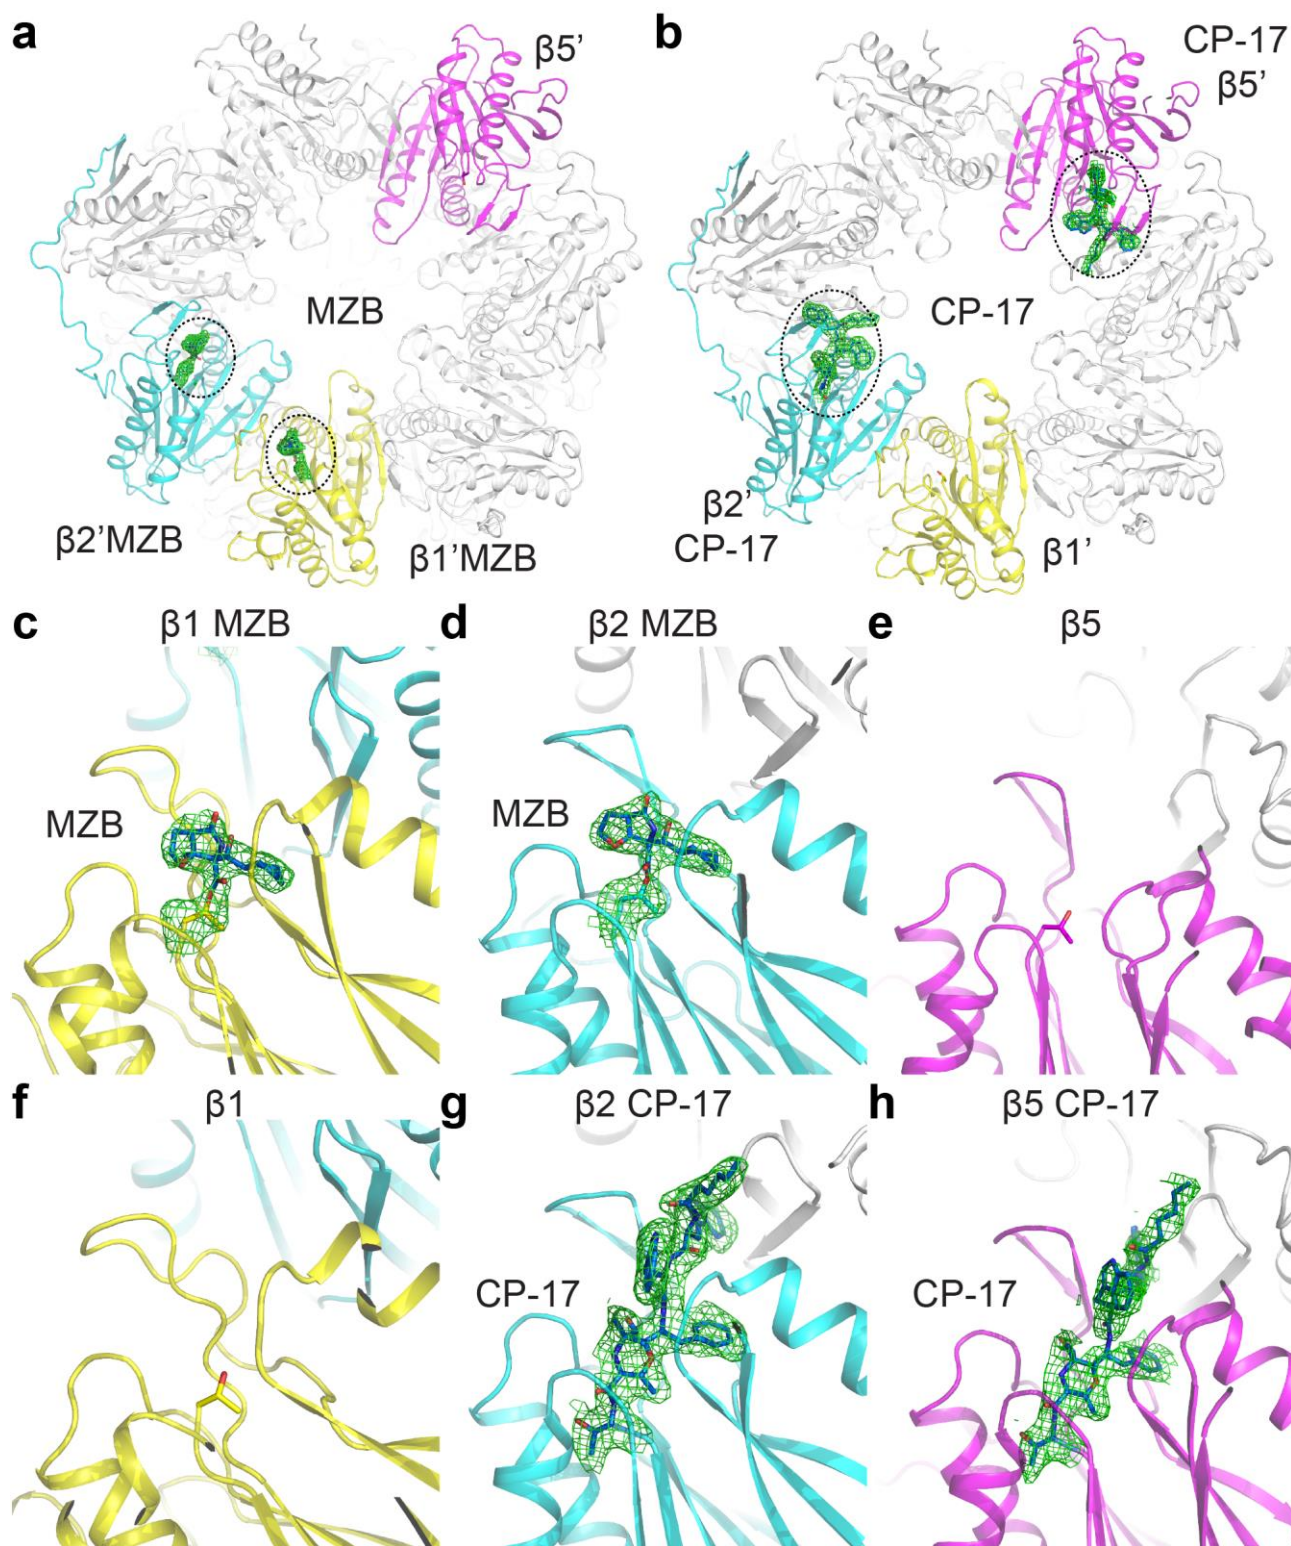

**Supplementary Figure 5. Structural comparison of cryo-EM maps of the inhibitor molecules MZB and CP-17 covalently bound in the active sites of *Tv20S***

The top views of both *Tv20S* structures with a) MZB and b) CP-17 inhibitors (both shown as blue sticks). Cryo-EM Maps are carved around inhibitors for clarity as green mesh at sigma 4. Detailed views on the active sites are shown as cartoon and sticks for inhibitors. MZB (panels c, d) and e) and CP-17 (panels f, g and h) are displayed with active sites in order:  $\beta 1$  (panels c&f shown in yellow),  $\beta 2$  (panels d) & g), shown in cyan), and  $\beta$  (panel e) & h), shown in magenta).



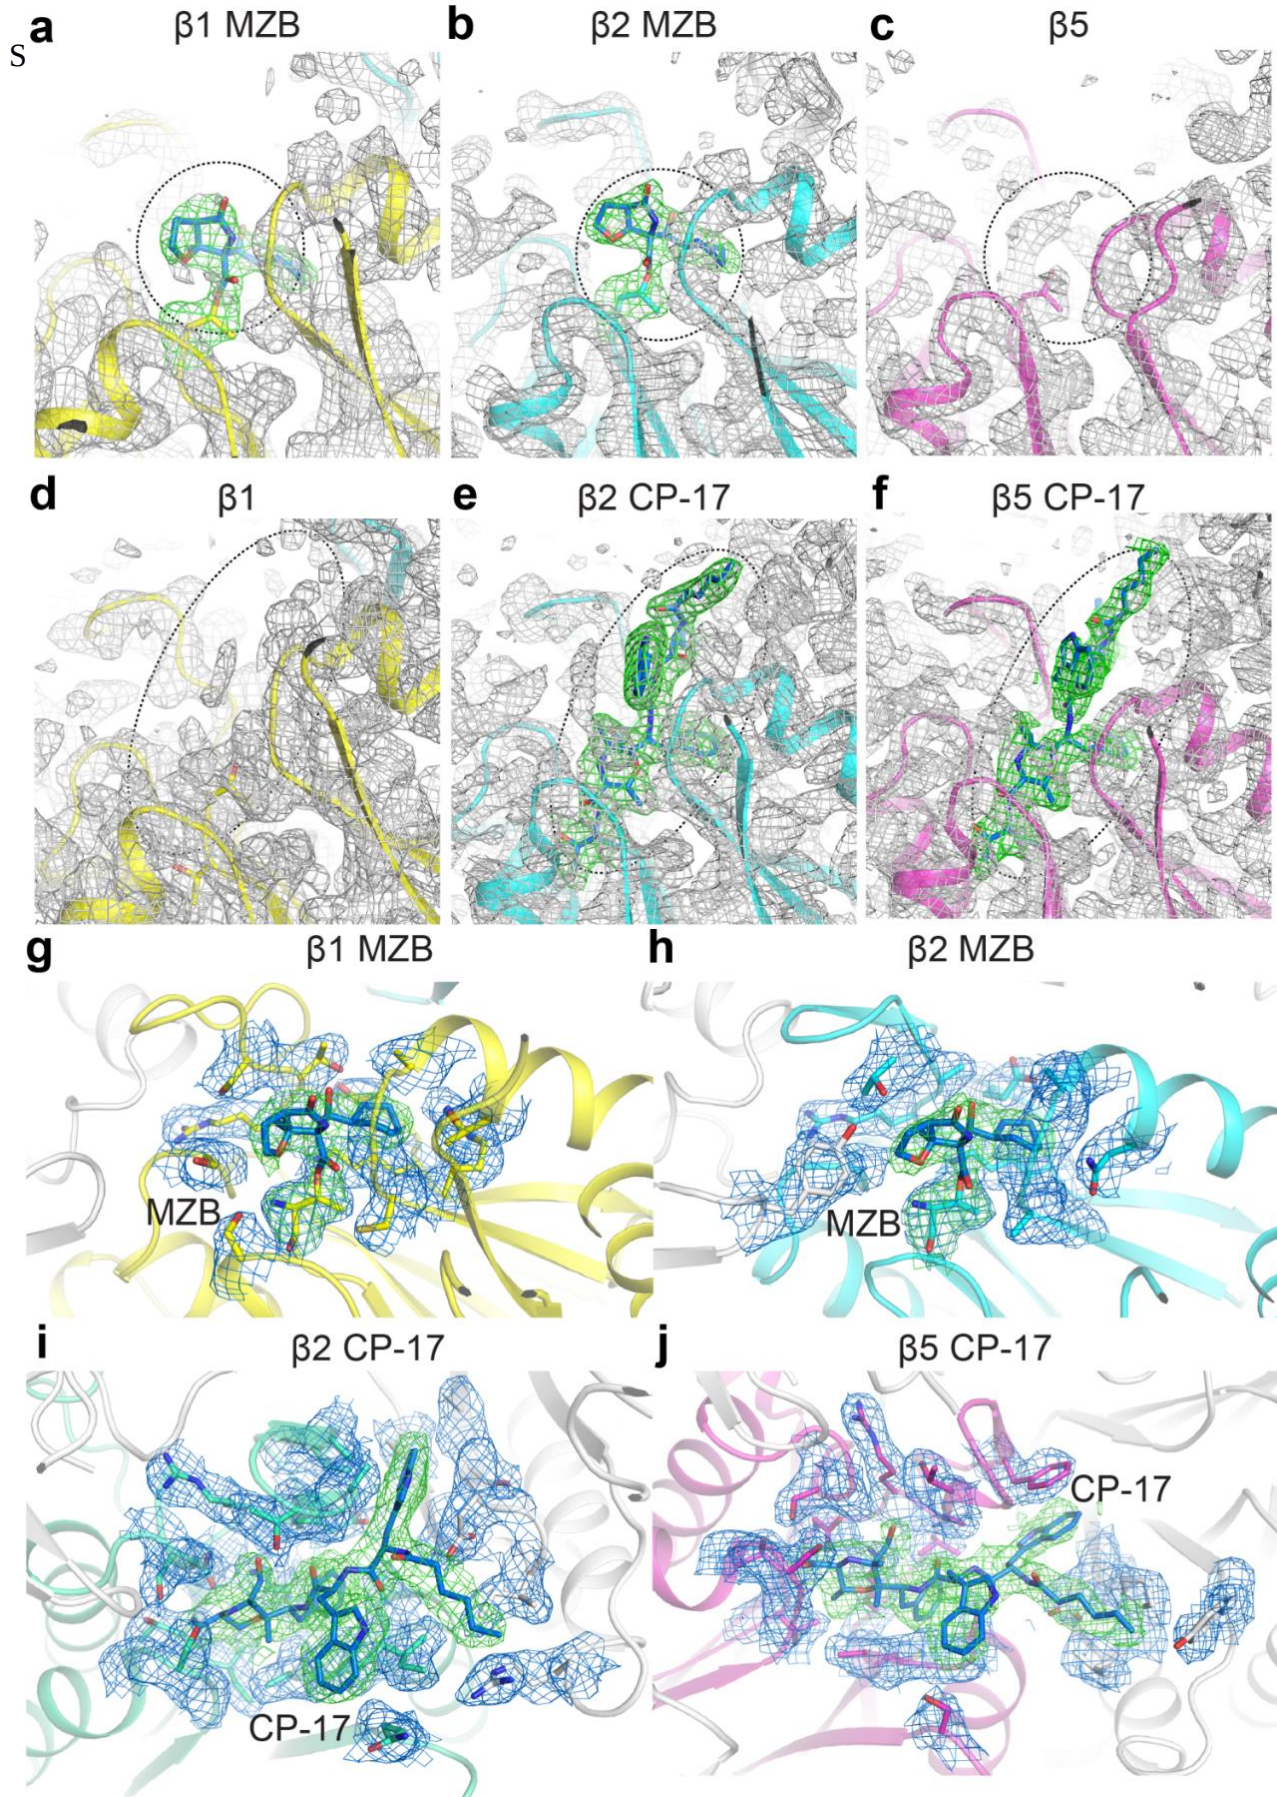

**Supplementary Figure 6. Cryo-EM maps in all three active sites for both *Tv*-20S structures**

Comparison of cryo-EM maps for both *Tv*20S structures with MZB (**a,b,c,g,h**) and CP-17 (**d,e,f,i,j**) inhibitors. Maps are shown as grey mesh at sigma 4 and density around inhibitors is depicted in green. Active sites are displayed in order:  $\beta 1$  (panels **a**) & **d**) are shown in yellow),  $\beta 2$  (panels **b**) & **e**), shown in cyan), and  $\beta$  (panel **c**) & **f**), shown in magenta. Panels **g**) - **j**) additionally show the density around *Tv*20S residues that form the binding site, and ligand, shown simultaneously as sticks and also cryo-EM maps at the same sigma level. The map around *Tv*20S residues is depicted in blue.



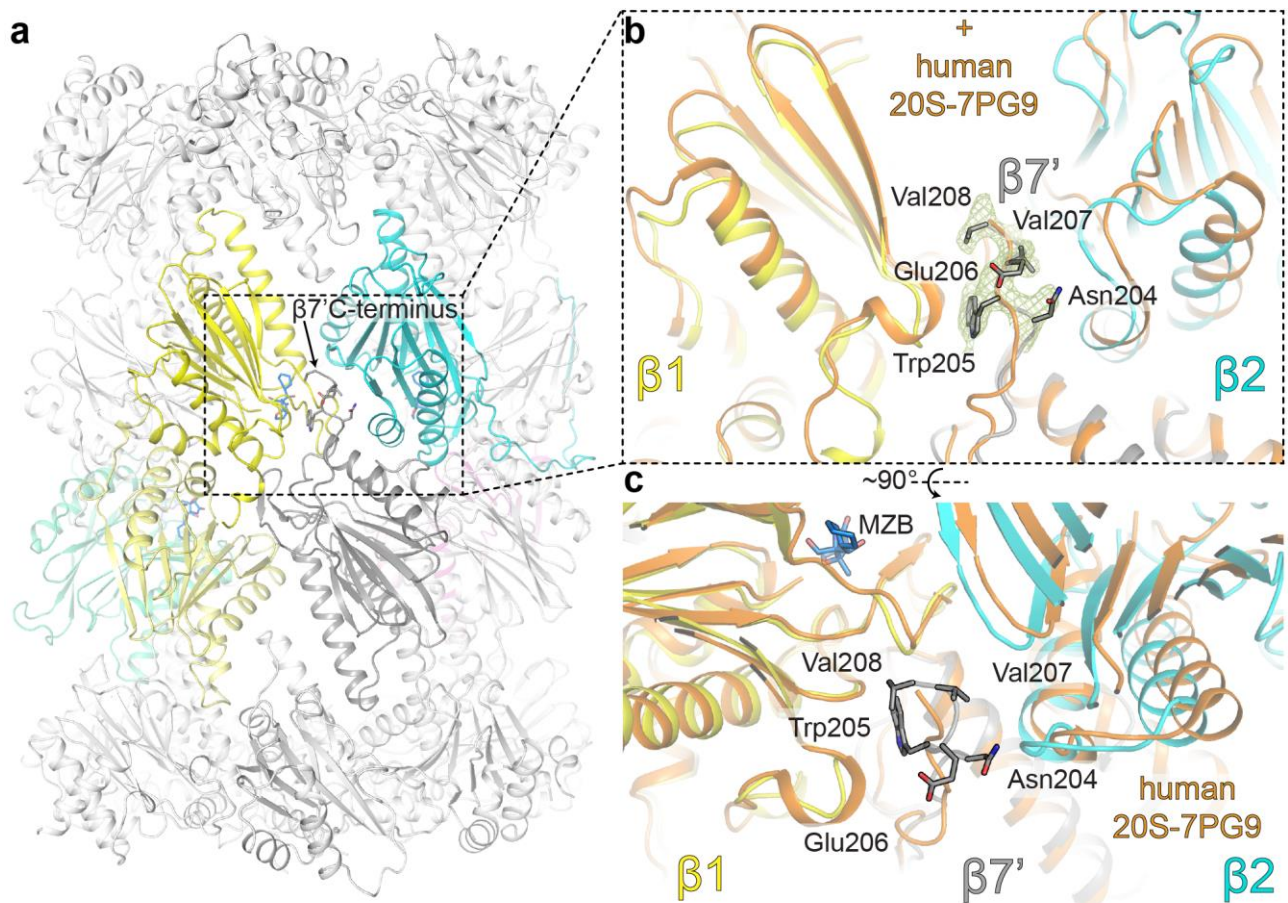

**Supplementary Figure 7. C-terminal end being properly inserted between the  $\beta 1$  and  $\beta 2$ .** a) *Tv*20S with MZB cartoon representation where  $\beta 1$  is shown in yellow,  $\beta 2$  cyan and  $\beta 7'$  grey with its the C-terminus marked by arrow. Panels b) shows local cryoEM map (green mesh) and c) show detailed view with an overlay with superimposed human 20S proteasome (PDB ID = 7PG9) shown in orange. The residues of  $\beta 7'$  Asn204-Val208 of *Tv*20S shown as grey sticks inserted between  $\beta 1$  and  $\beta 2$  chains.

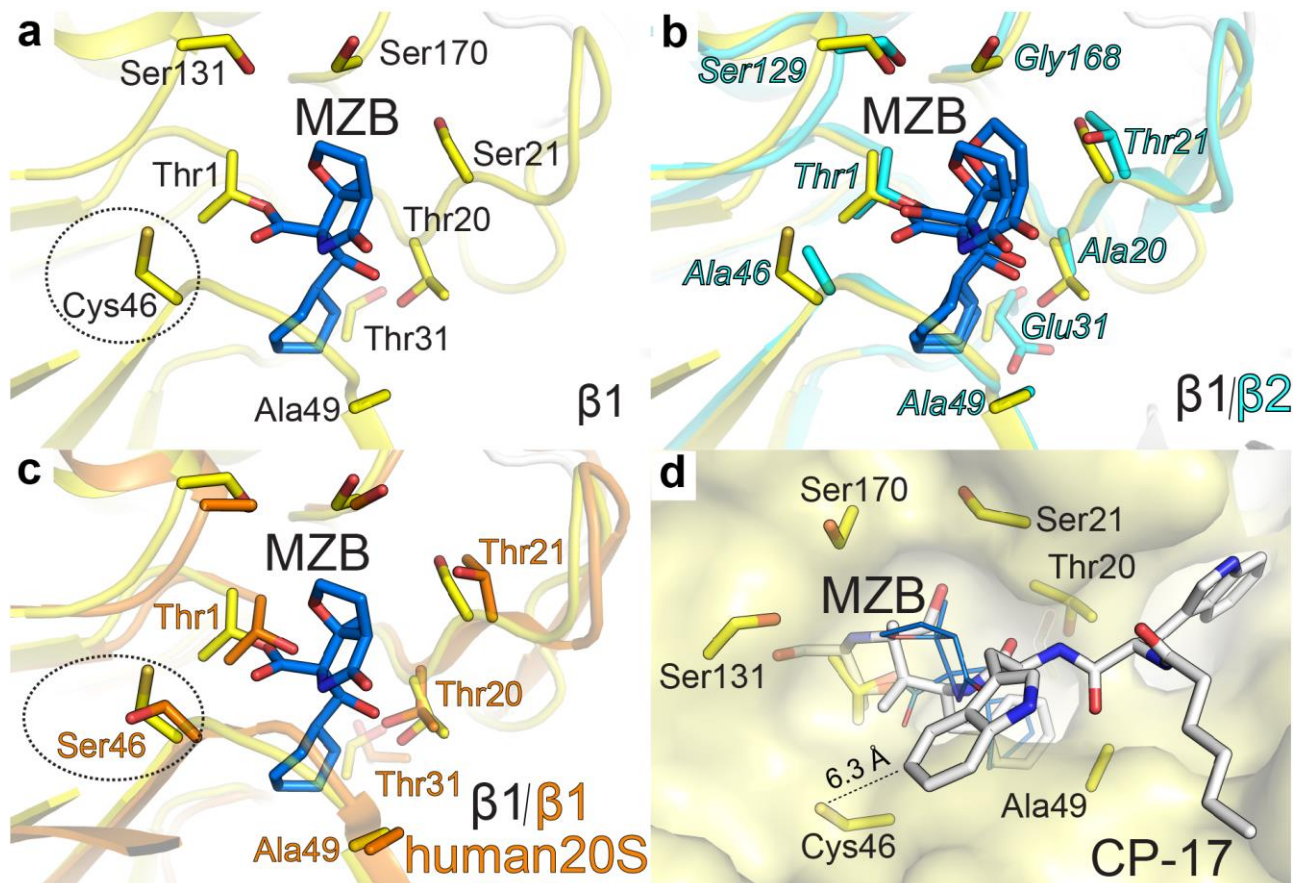

**Supplementary Figure 8. Prospects for developing inhibitors that target Cys46 of the  $\beta 1$  subunit of *Tv*20S proteasome.**

**a)** The active site of the  $\beta 1$  subunit in the *Tv*20S-MZB proteasome structure is highlighted in yellow, while MZB is shown as blue sticks. This region includes neighbouring residues, including Cys46. **b)** The structural overlay of  $\beta 1$  and  $\beta 2$  (cyan sticks) subunits of *Tv*20S-MZB proteasome. **c)** An overlay comparison is made between the  $\beta 1$  active site of *Tv*20S-MZB (shown in yellow, with MZB represented as blue sticks) and the human 20S structure, PDB ID = 7PG9 (shown in orange). **d)** Another overlay is presented, showcasing only the CP-17 inhibitor (depicted in white) of the  $\beta 2$  subunit onto the  $\beta 1$  active site of *Tv*20S-MZB (represented in yellow, with MZB shown as blue lines).



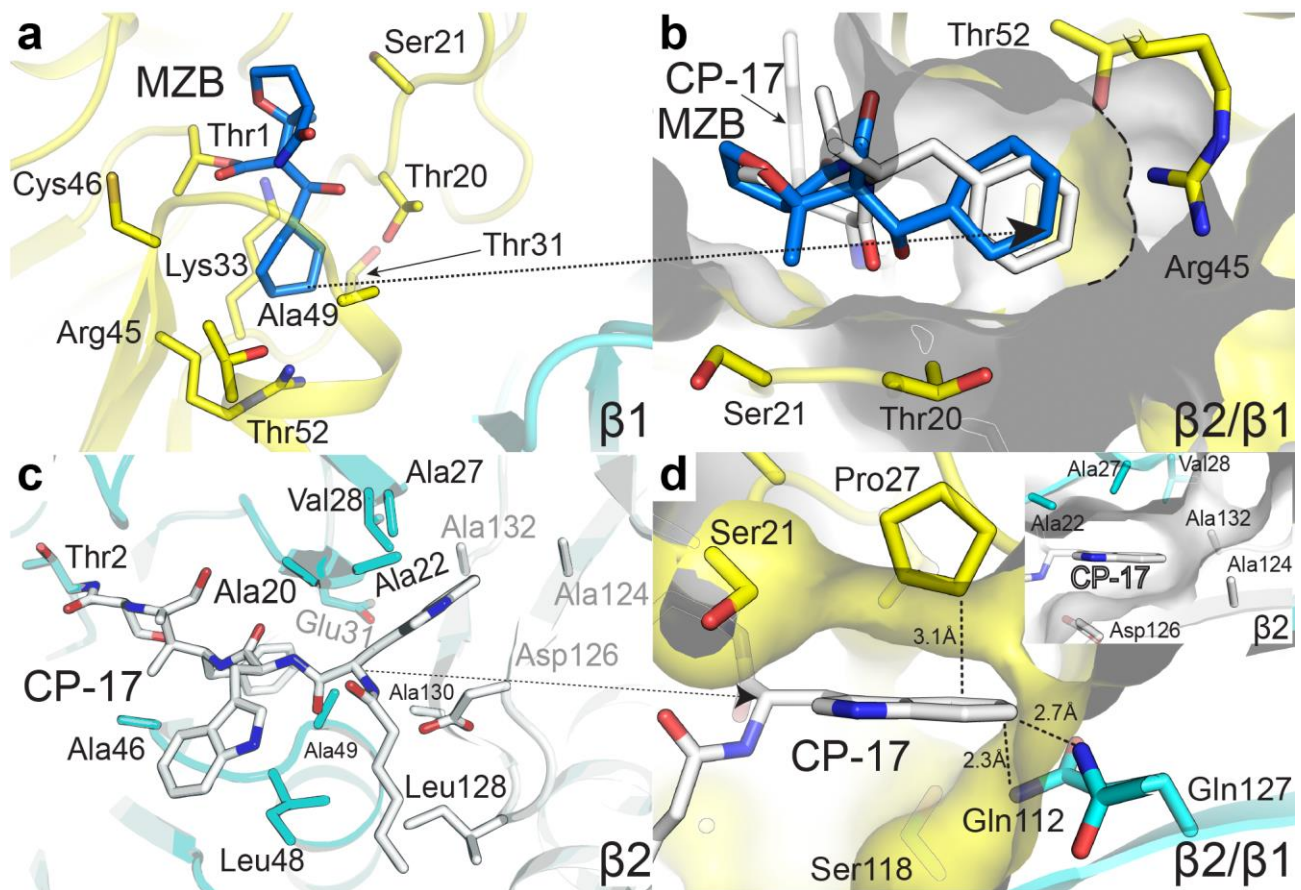

**Supplementary Figure 9. Model of CP-17 “virtual” clashes within the *Tv*20S proteasome  $\beta 1$  active site pocket**

**a)** The  $\beta 1$  active site of *Tv*20S-MZB structure (shown in yellow, MZB in blue) with neighbouring residues including Cys46. **b)** The surface of  $\beta 1$  with MZB (yellow and blue sticks) and  $\beta 2$  with and overlay of surface and CP-17 inhibitor (white and white sticks) from the  $\beta 2$  of *Tv*20S-CP-17 proteasome. CP-17 is shown as white sticks for clarity. **c)** Detail of  $\beta 2$  with CP-17 with highlighted residues mainly surrounding indole rings. **d)** The inset of the figure shows surface of  $\beta 2$  S3 pocket of *Tv*20S-CP-17 proteasome. The main panel shows surface of  $\beta 1$  site with CP-17 (white) modelled by superimposition of  $\beta 2$  and  $\beta 1$  subunits. The  $\beta 1$  pocket is lined with much bulkier residues such as Pro27 and polar residues Ser118, Gln112 and Gln127. Unlike in the  $\beta 2$  pocket lined with smaller and more hydrophobic residues Ala (22,27,124,126,132) and Val28.

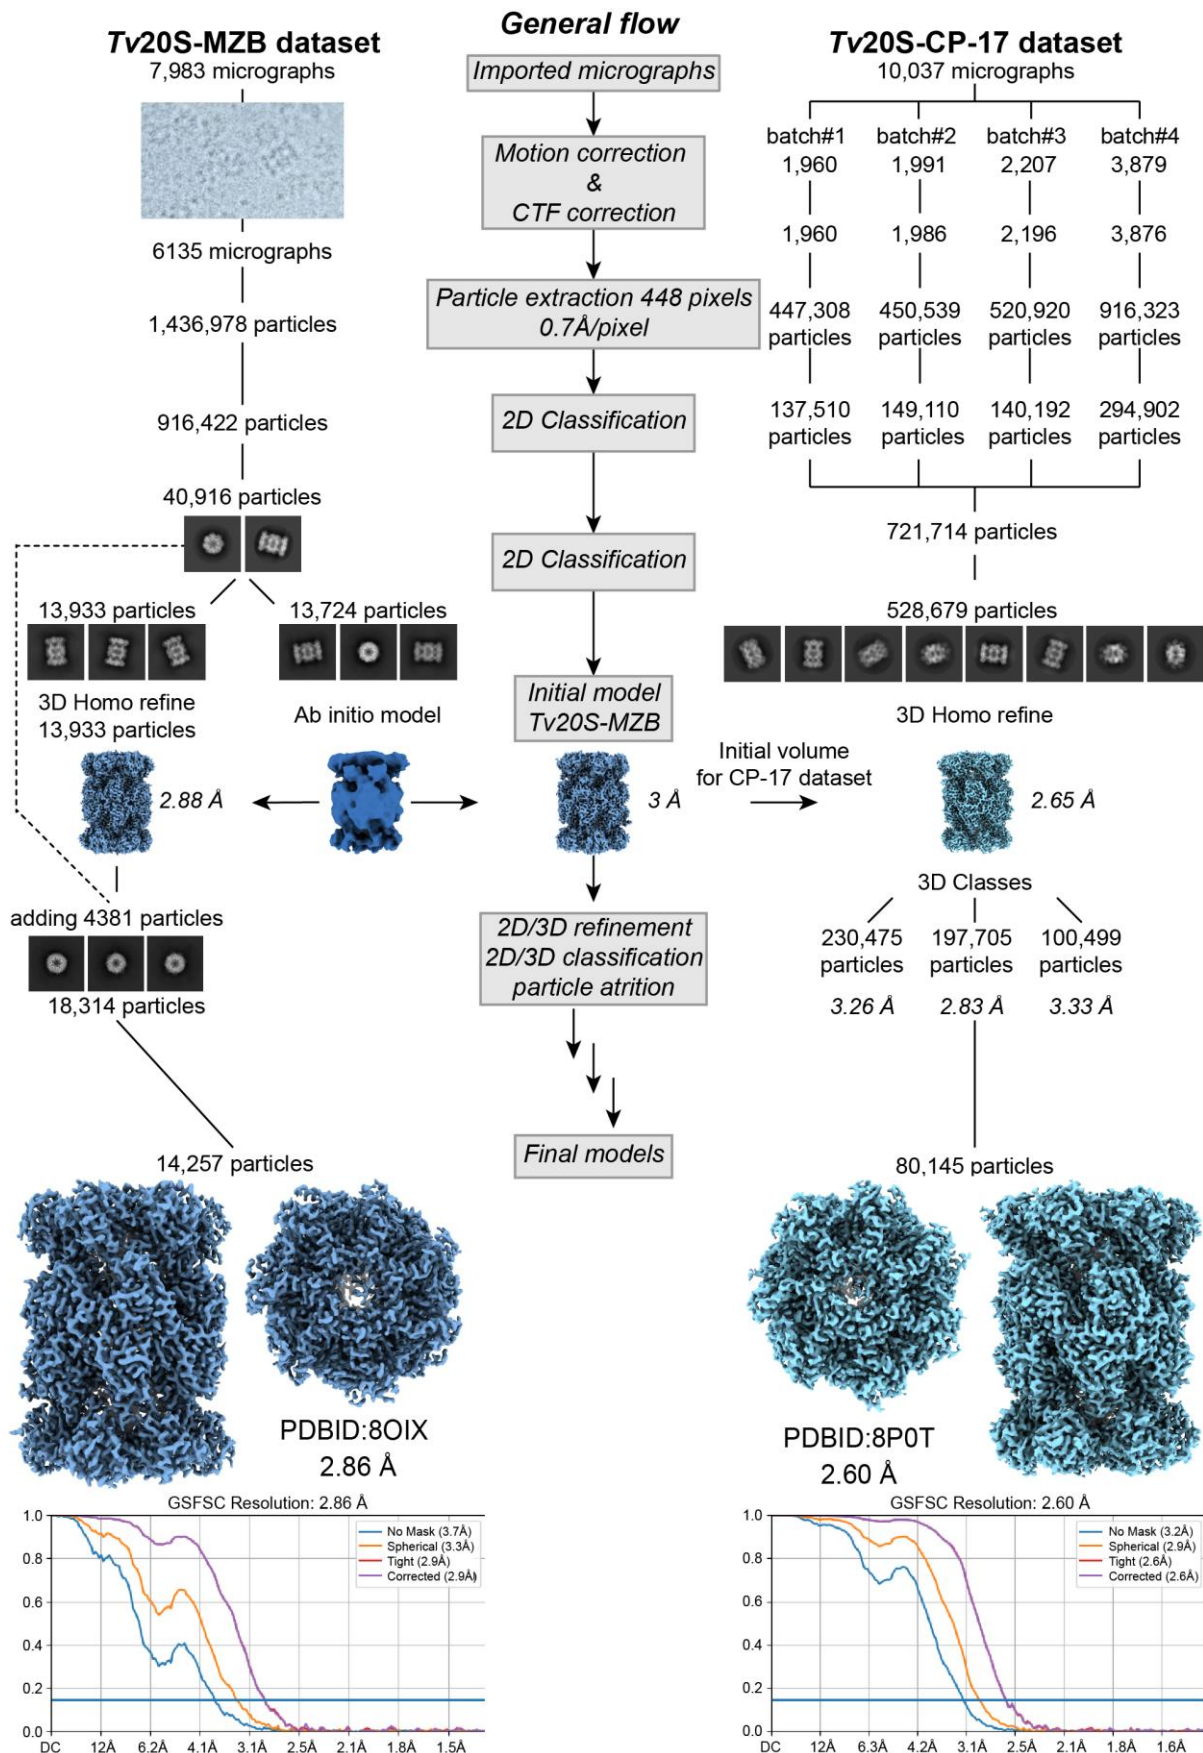

**Supplementary Figure 10. Cryo-EM workflow of data processing.** This image processing workflow was employed to reconstruct the Tv20S structures in cryo-EM. Both datasets were acquired at Titan Krios with the Falcon 4i detector under identical conditions using the same setup (refer to Supplementary Table 1 for details). The *ab initio* model served as the starting point for 3D homogeneous refinement (Homogeneous Refinement) to enhance the quality of the maps. Multiple iterations, including 3D classification and 2D classification, were



carried out in several rounds to eliminate unwanted particles, refine the resolution, and improve the maps. The unsharpened maps of the final reconstruction and the gold-standard Fourier Shell Correlation (FSC) curve using different masks are shown. The figures of the maps were generated by ChimeraX<sup>2</sup>. The resolution in italics corresponds to a particular Fourier Shell Correlation Cryosparc and was used to navigate the process of data analysis. The final resolution was estimated by Fourier Shell Correlation job in Cryosparc<sup>3</sup> when a tight mask was applied and was estimated to be 2.86 Å for 8IOX and 2.60 Å for 8P0T. An example of the Tv20S-MZB route of processing is as follows: 1,436,978 particles were extracted from 6135 processed images. After several rounds of 2D classification to sort out unwanted classes, only 40,916 particles remained. These were then reclassified with independent 2D classifications for the top views and the side views. Separately, classes with 13,724 particles of both views were used for an ab initio model. This initial cryo-EM map was used as a starting model for homogeneous reconstruction, where 13,933 side view particles were used. Next, 4381 particles corresponding to the top views were added in the next round. For the final model, additional particles were removed during several rounds of homogeneous reconstruction and 3D classifications. Note: clear top views of the full proteasome were assumed to be the particles with the highest contrast. Representative Cryo-EM images are shown in subsequent Supplementary Figure 11.

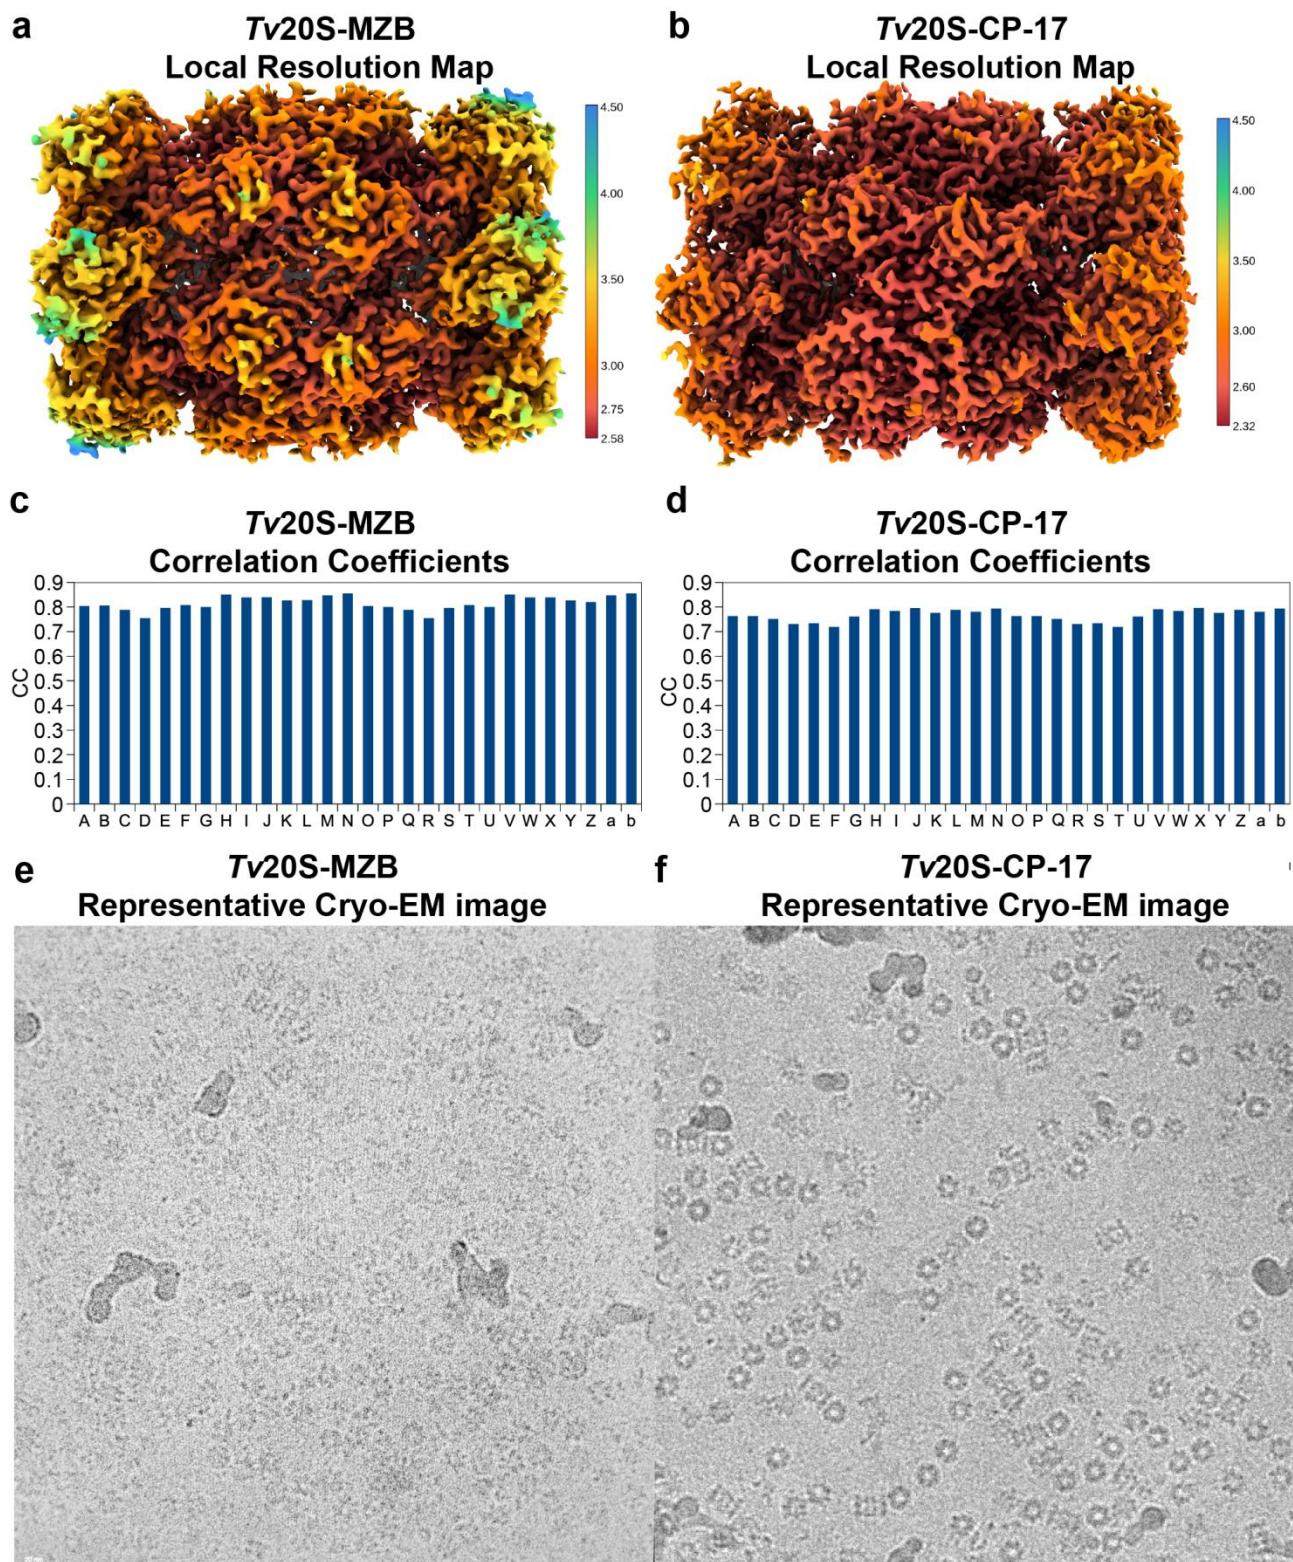

**Supplementary Figure 11. Cryo-EM maps coloured according to the calculated local resolution and example of Cryo-EM images.** The estimate of local resolution for both *Tv20S* structures a) 8OIX and b) 8P0T are compared. c&d show average map correlation coefficient for each chain. Source data are provided as a Source Data file Figures.xlsx. Panels e&f demonstrate the particle density and quality of Cryo-EM images for both datasets.



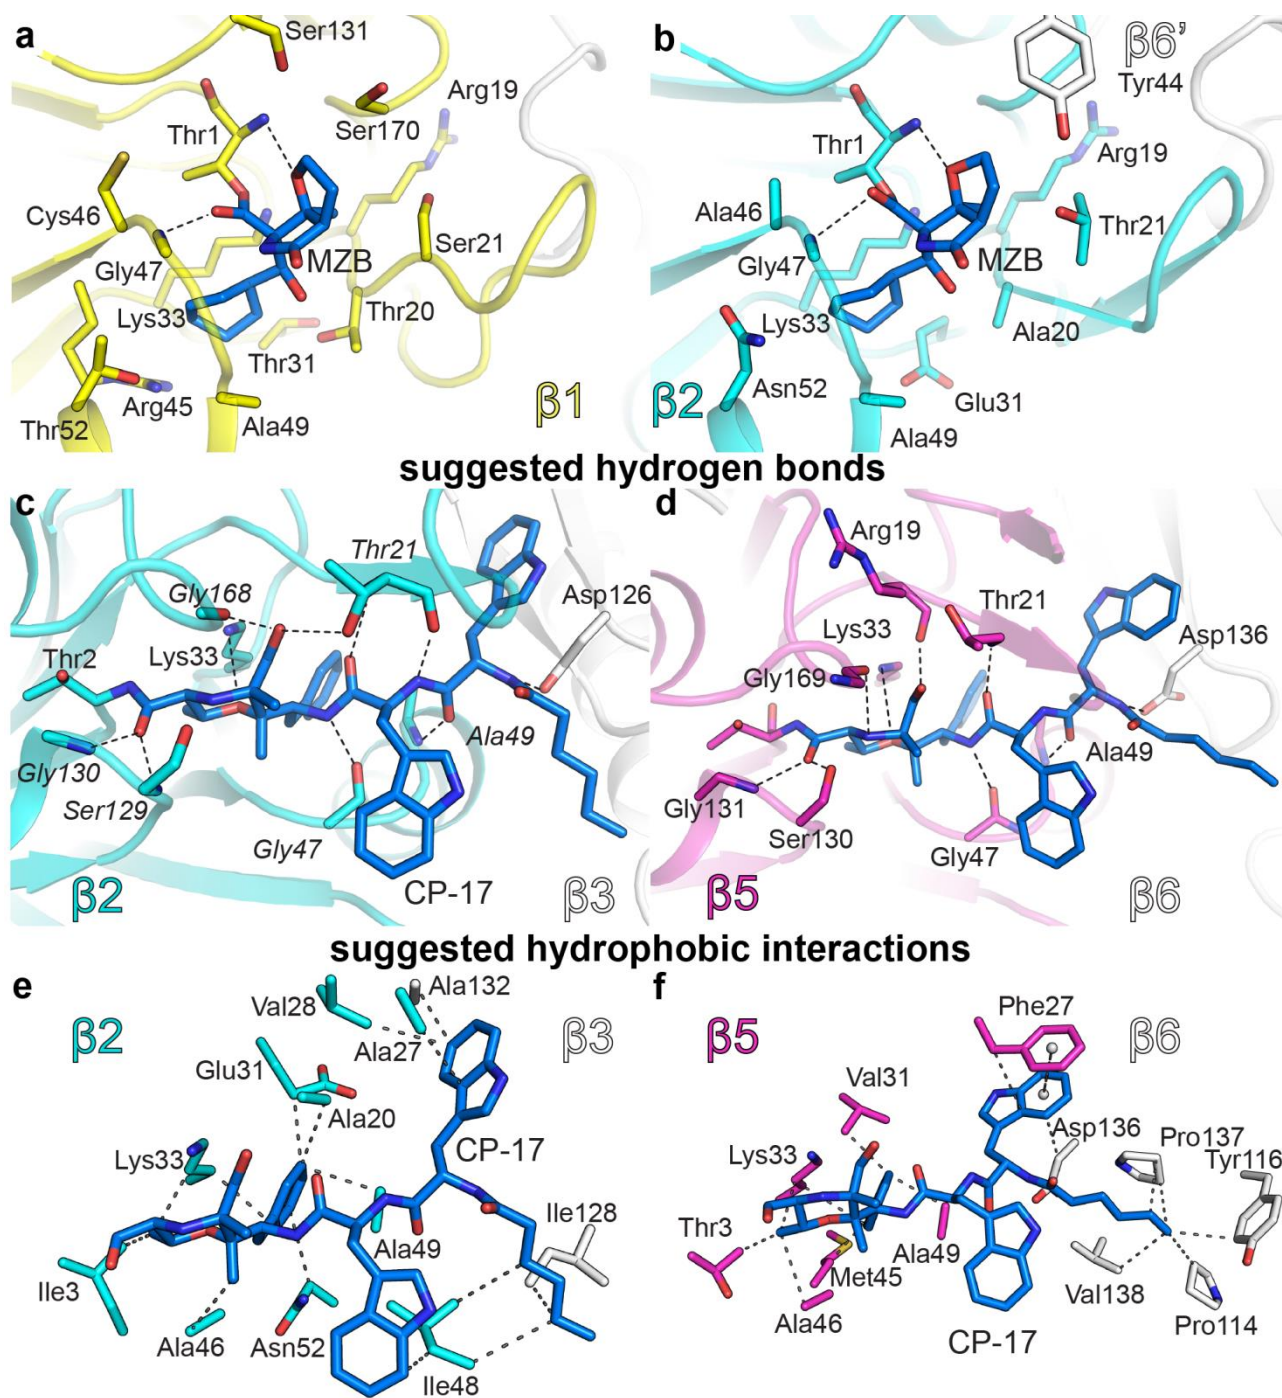

**Supplementary Figure 12. Detailed interactions between small molecular inhibitors and active site pockets of *Tv20S*.** The interactions between amino acid residues surrounding the active sites of *Tv20S* with the inhibitors; **a) & b)** MZB and **c)-f)** CP-17 with highlighted residues shown as sticks suggest interactions with inhibitors. Dashed lines represent hydrogen bridges in panels **a)-d)** and “hydrophobic” interactions are shown in panels **e) & f)**.

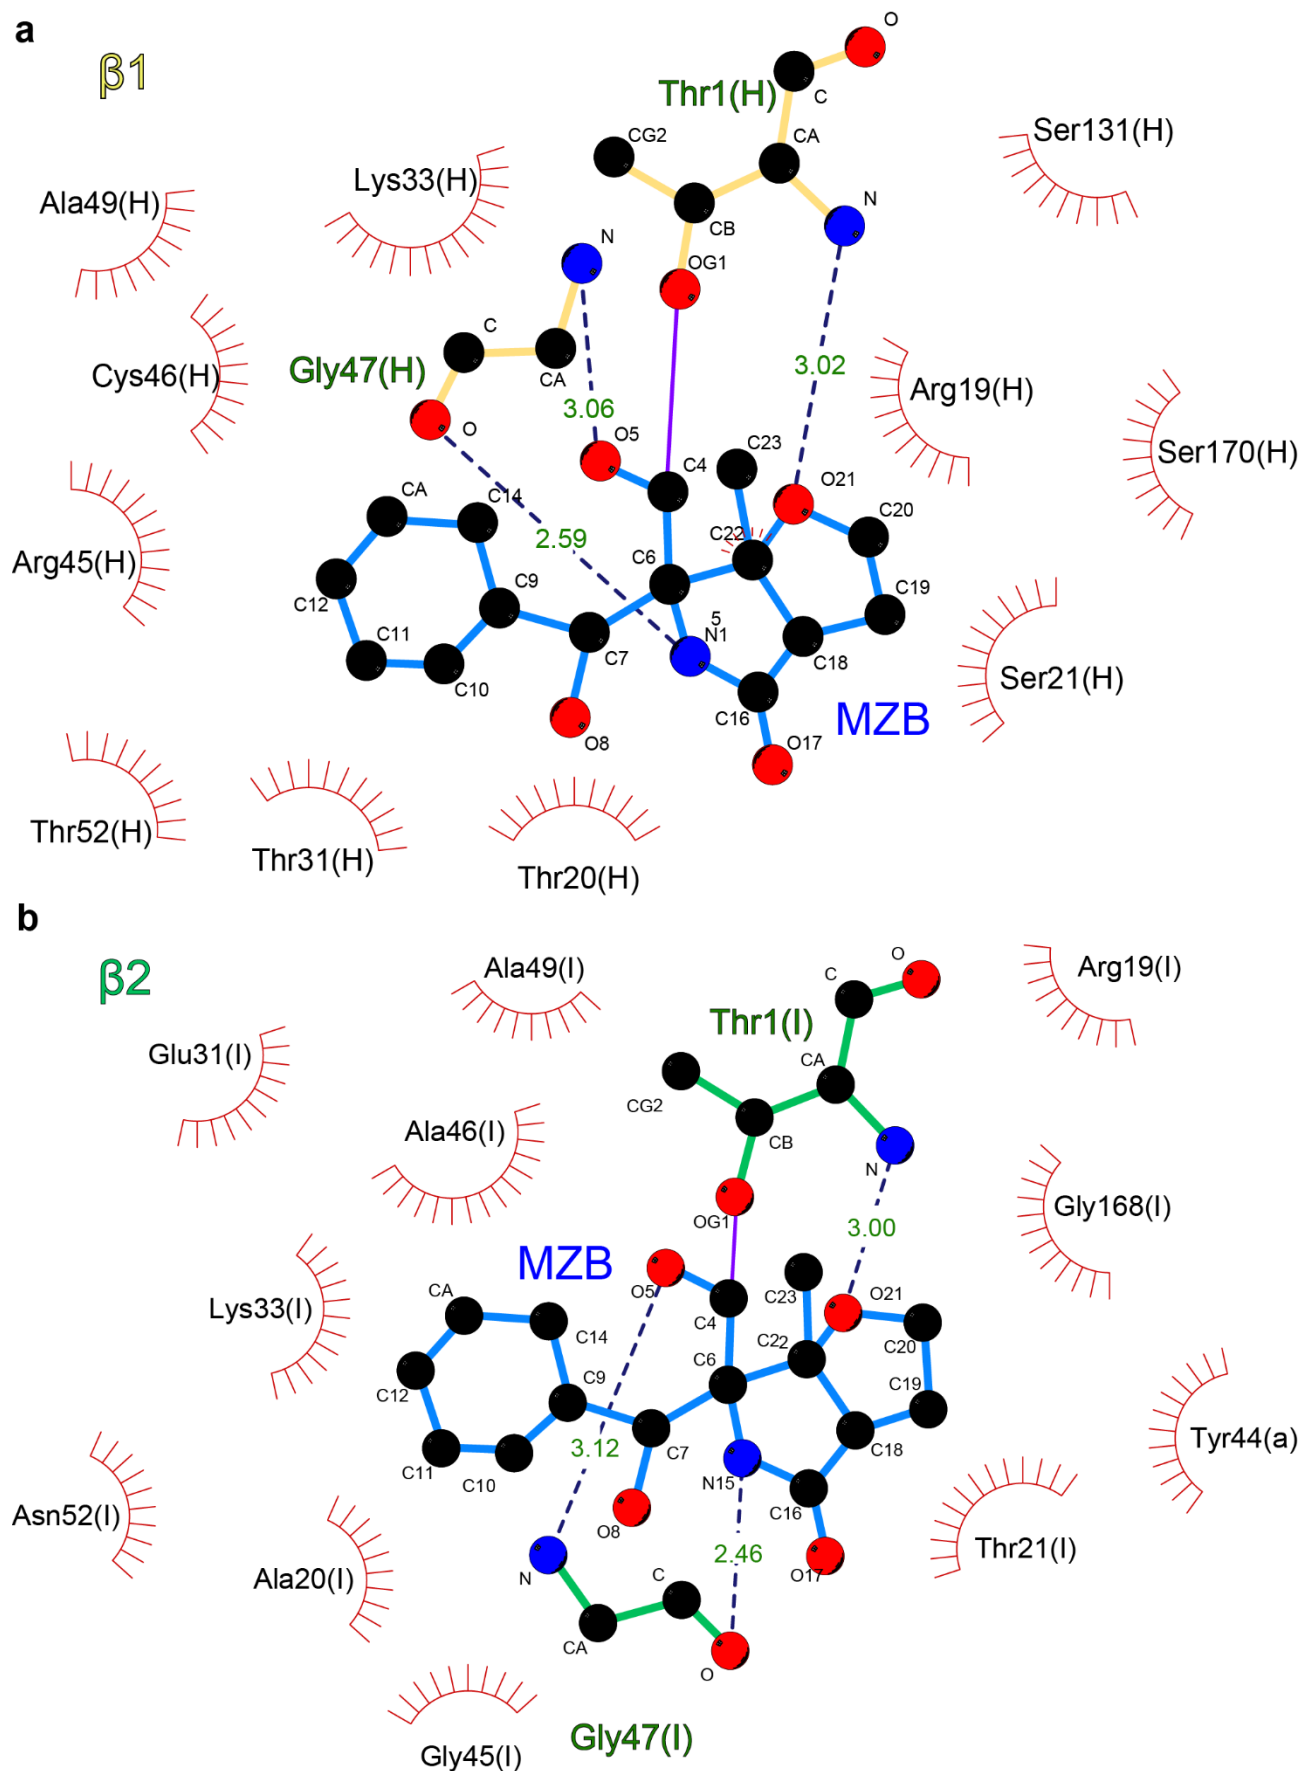

**Supplementary Figure 13. MZB 2D representation of interactions between small molecular inhibitor MZB and *Tv20S* active site. a) & b) highlight residues in close contact with inhibitor in  $\beta 1$  and  $\beta 2$  active sites. Dashed lines represent hydrogen bridges, and “fan-like structures” demonstrate possible hydrophobic interaction.**

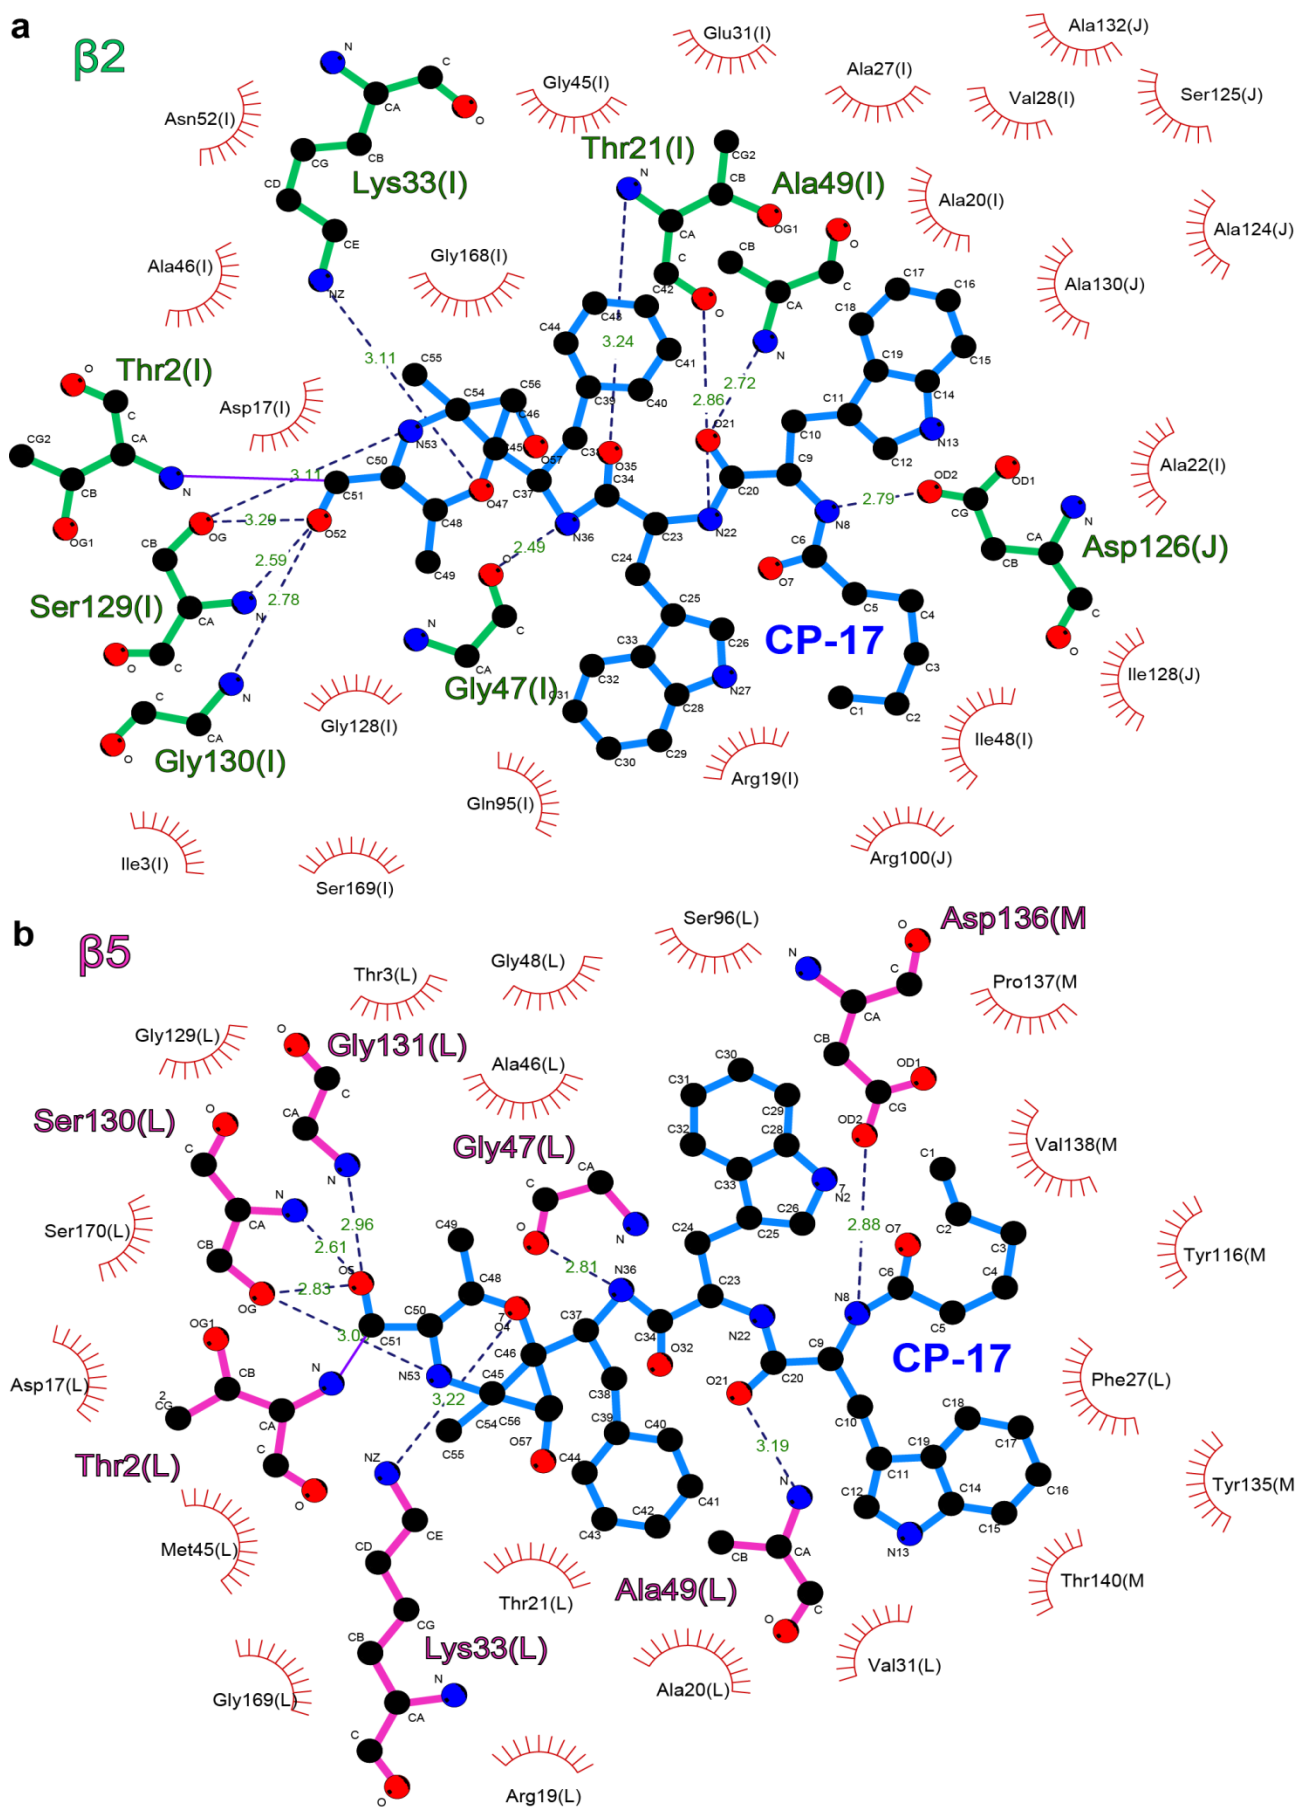

**Supplementary Figure 14. The lig plot CP-17 2D representation of interactions between molecular inhibitor CP-17 and the active site of *Tv20S*. a) & b) highlight residues in close contact with inhibitor in  $\beta 2$  and  $\beta 5$  active sites. Dashed lines represent hydrogen bridges, and “fan-like structures” demonstrate possible hydrophobic interaction.**



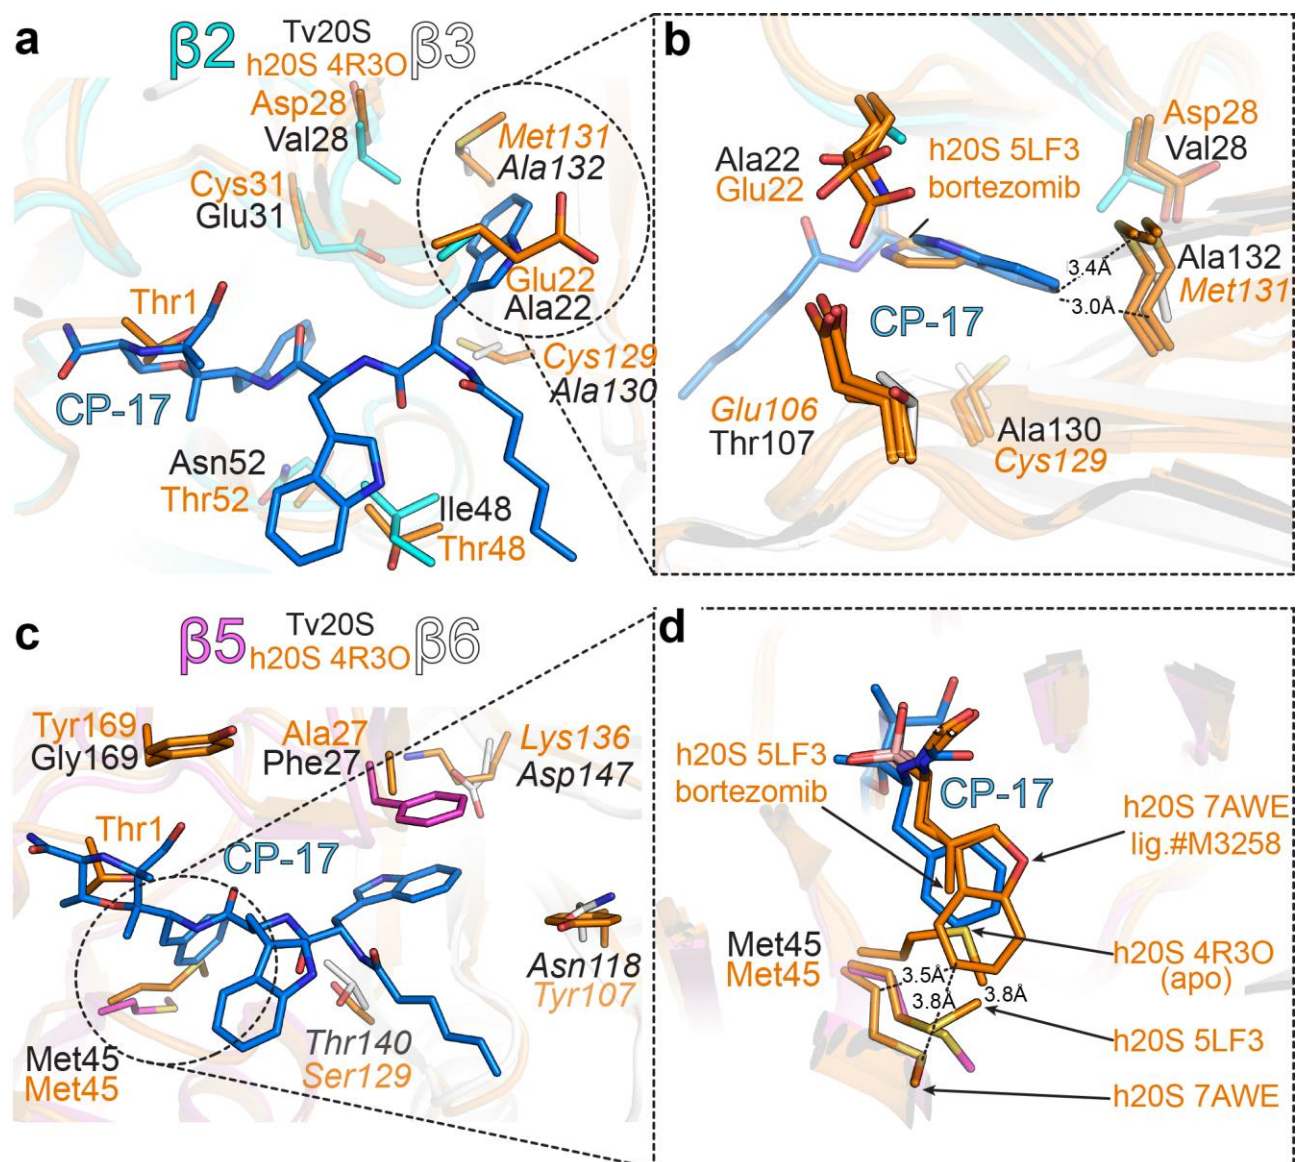

**Supplementary Figure 15. The main differences of *Tv20S* and potential clashes CP-17 in human 20S proteasome  $\beta 2$  and  $\beta 5$  active site pockets.** Structural superimposition of *Tv20S*-CP-17 (8P0T) with human 20S (PDBID = 4R30, and 5LF3 with 7AWE in right hand panels). **a)** The rotamer of human 20S (PDB ID = 4R30) Met131 ( $\beta 3$ ) is relatively close and bulky compared to Ala of *Tv20S*, **b)** another view to the  $\beta 2$  active site besides 4R30 structure with the overlay of additional two structures 5LF3, 7AWE shows potential clash between CP-17 and Met131. Additionally, the Glu106 ( $\beta 3$ ) and Glu22 ( $\beta 2$ ) of human 20S suggest additional site of steric hindrance for CP-17 Panels **c)** & **d)** show similar contact of possible clash yet the rotamers in different structures such as 7AWE show deflection from the possible clash. Human 20S proteasome is shown in orange.

**Supplementary Table 1. Structural alignment of 20S proteasome *Tv20-CP1 7ZYJ* with leishmania and human 20S proteasomes.**

The table represents RMSD values for alignments of C $\alpha$  of individual chains *Tv20-CP17* with *Leishmania tarentolae* 20S proteasome and human proteasome:

|            | RMSD<br><i>Leishmania</i> 7ZYJ | Chain<br>ID | RMSD<br><b>Human</b><br>7PG9 |           | RMSD<br><i>Leishmania</i><br>7ZYJ | Chain<br>ID | RMSD<br><b>Human</b><br>7PG9 |
|------------|--------------------------------|-------------|------------------------------|-----------|-----------------------------------|-------------|------------------------------|
| $\alpha$ 1 | 1.252                          | A           | <b>1.153</b>                 | $\beta$ 1 | 0.975                             | H           | <b>0.976</b>                 |
| $\alpha$ 2 | 1.219                          | B           | <b>1.031</b>                 | $\beta$ 2 | 0.807                             | I           | <b>0.989</b>                 |
| $\alpha$ 3 | 0.985                          | C           | <b>1.260</b>                 | $\beta$ 3 | 0.886                             | J           | <b>0.898</b>                 |
| $\alpha$ 4 | 1.048                          | D           | <b>1.028</b>                 | $\beta$ 4 | 0.960                             | K           | <b>1.289</b>                 |
| $\alpha$ 5 | 1.252                          | E           | <b>1.099</b>                 | $\beta$ 5 | 0.870                             | L           | <b>1.010</b>                 |
| $\alpha$ 6 | 1.116                          | F           | <b>1.144</b>                 | $\beta$ 6 | 1.228                             | M           | <b>1.050</b>                 |
| $\alpha$ 7 | 1.121                          | G           | <b>1.205</b>                 | $\beta$ 7 | 1.178                             | N           | <b>1.489</b>                 |

Overall RMSD values:

20S proteasome *Tv20-CP17* with *Leishmania tarentolae* 20S proteasome **RMSD = 2.729**

20S proteasome *Tv20-CP17* with human 20S proteasome **RMSD = 2.541**

The average RMSD values:

for all chains of *Leishmania tarentolae* 20S proteasome RMSD = 1.064

20S proteasome *Tv20-CP17* with human 20S proteasome RMSD = 1.116\*

(RMSD values were calculated for *Tv20-CP17* (8P0T as a fix model) and human crystal structure (7PG9) for C $\alpha$  atoms in the Pymol [The PyMOL Molecular Graphics System, Version 2.5.5 Schrödinger, LLC] using the command:align)

**Supplementary Table 2. Cryo-EM statistics for data collection, refinement, and validation.**

| Deposited Cryo-EM structure           | <b>Tv20S-MZB PDBID: 8OIX</b> | <b>Tv20S-CP-17 PDBID: 8P0T</b> |
|---------------------------------------|------------------------------|--------------------------------|
| Microscope                            | Titan Krios                  | Titan Krios                    |
| Detector                              | Falcon 4i                    | Falcon 4i                      |
| Magnification (nominal)               | 165,000x                     | 165,000x                       |
| Voltage (kV)                          | 300                          | 300                            |
| Spherical aberration                  | 2.7 mm                       | 2.7 mm                         |
| Total electron dose (e <sup>-</sup> ) | 40                           | 40                             |
| Defocus range (μm)                    | (-2.4)–(-0.9)                | (-2.4)–(-0.9)                  |
| Exposure (s)                          | 2.25                         | 2.25                           |
| Pixel size (Å)                        | 0.75                         | 0.75                           |
| Number of Micrographs                 | 7,983                        | 10,037                         |
| Final number of particles             | 14,257                       | 80,145                         |
| Map resolution (Å)<br>[FSC threshold] | 2.86 [FSC <sub>0.143</sub> ] | 2.60 [FSC <sub>0.143</sub> ]   |
| <b>Refinement</b>                     |                              |                                |
| Initial model used (PDBID)            | 7ZYJ                         | 8OIX                           |
| Symmetry during reconstruction        | C2                           | C2                             |
| <b>Validation</b>                     |                              |                                |
| MolProbity score                      | 1.62                         | 1.67                           |
| Clashscore, all-atom                  | 11.17                        | 11.90                          |
| Rotamer outliers                      | 0.93 %                       | 1.21 %                         |
| <b>Ramachandran plot</b>              |                              |                                |
| Favoured                              | 97.73 %                      | 97.92 %                        |
| Outliers                              | 0.00 %                       | 0.00 %                         |
| <b>RMSD bonds</b>                     |                              |                                |
| Length (Å)                            | 0.004                        | 0.004                          |
| Angles (°)                            | 0.611                        | 0.659                          |
| <b>Model vs. Data</b>                 |                              |                                |
| Ligands (no.)                         | 4 (MZB)                      | 4 (CP-17)                      |
| CC (mask/box/ligand)                  | 0.87 / 0.68 / 0.80           | 0.84 / 0.64 / 0.77             |
| B-factor protein (min/max/mean)       | 3.38 / 99.85 / 40.13         | 0.00 / 78.57 / 29.79           |
| B-factor ligand (min/max/mean)        | 42.42 / 57.82 / 49.23        | 12.71 / 39.10 / 24.94          |
| <b>Resolution Estimates (Å)</b>       |                              |                                |
| FSC model unmasked (0/0.143/0.5)      | 2.7 / 2.7 / 3.1              | 2.5 / 2.5 / 2.8                |

*Refinement and model vs data values were calculated using Phenix 1.20.1-4487*



**Supplementary references**

- 1 Robert, X. & Gouet, P. Deciphering key features in protein structures with the new ENDscript server. *Nucleic Acids Res* **42**, W320-324 (2014). <https://doi.org:10.1093/nar/gku316>
- 2 Meng, E. C. *et al.* UCSF ChimeraX: Tools for structure building and analysis. *Protein science : a publication of the Protein Society* **32**, e4792 (2023). <https://doi.org:10.1002/pro.4792>
- 3 Punjani, A., Rubinstein, J. L., Fleet, D. J. & Brubaker, M. A. cryoSPARC: algorithms for rapid unsupervised cryo-EM structure determination. *Nature methods* **14**, 290-296 (2017). <https://doi.org:10.1038/nmeth.4169>

**Uncropped gels for Supplementary Figure 3a, b**

denaturing gel - silver stained

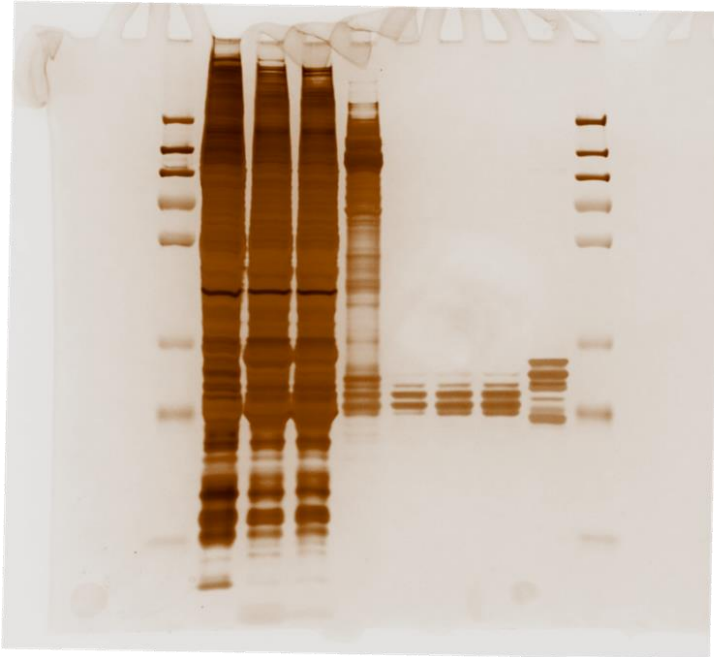

fluorescence

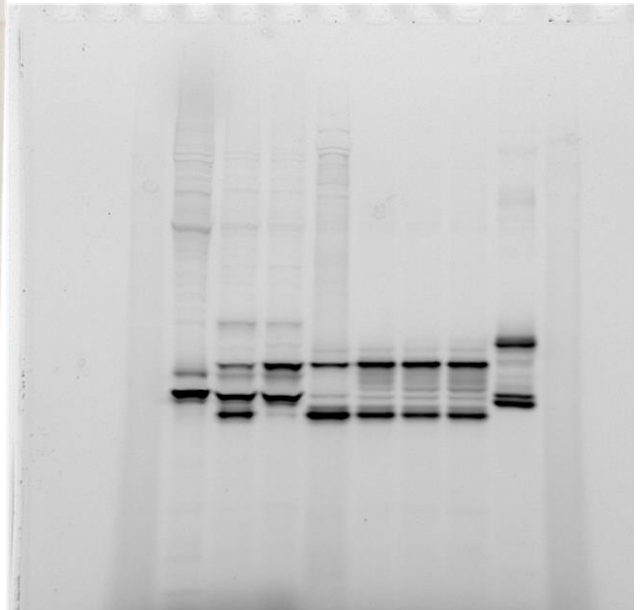

1. Sf lysate non-infected cells
2. alpha, beta, ump-1 coexpression
3. alpha, beta coexpression
4. 6. native Tv20S
- 5.-7. rTv20S
8. c20S

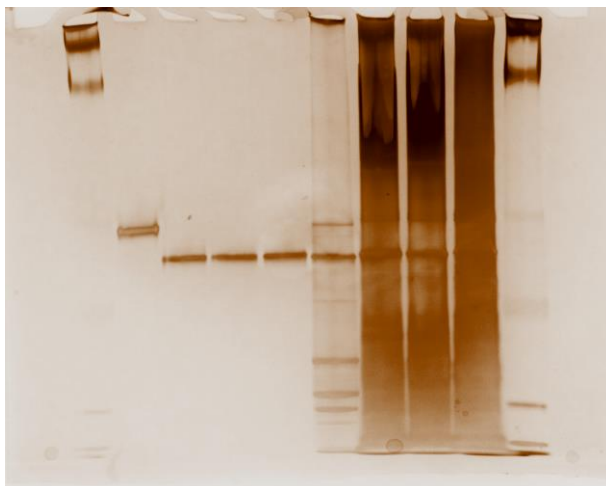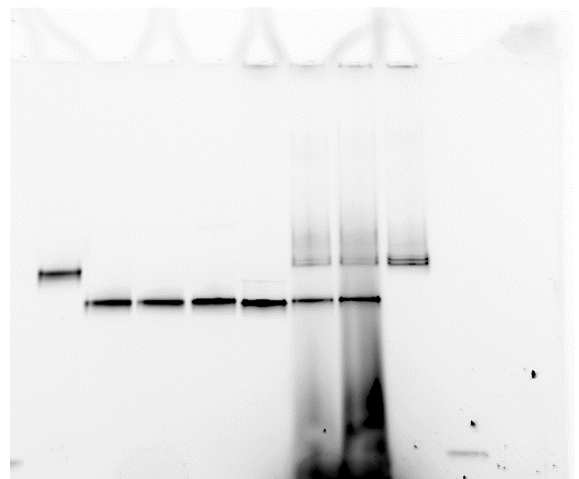

1. Sf lysate non-infected cells
2. alpha, beta, ump-1 coexpression
3. alpha, beta coexpression
4. 6. native Tv20S
- 5.-7. rTv20S
8. c20S

**Uncropped gel for Supplementary Figure 3c**

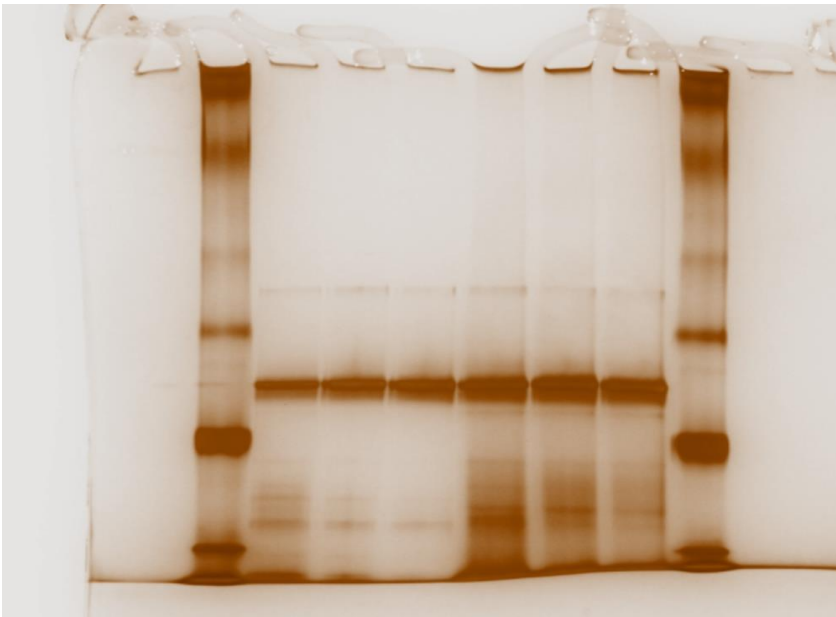

- 1) rTv20S + Ump time 0
- 2) rTv20S + Ump time 24 h
- 3) rTv20S + Ump time 72 h
- 4) rTv20S-Ump time 0
- 5) rTv20S - Ump time 24 h
- 6) rTv20S - Ump time 72 h

**Uncropped gels for Supplementary Figure 3e**

Native silver stain

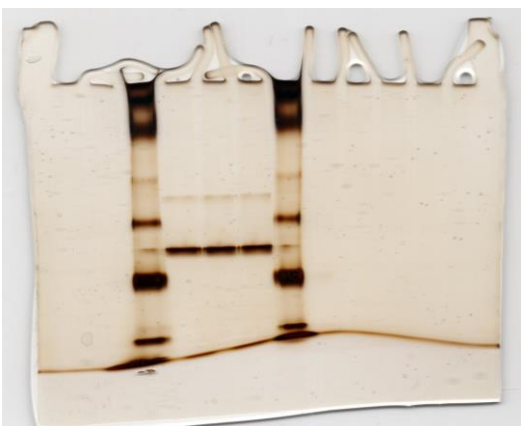

Fluorescence

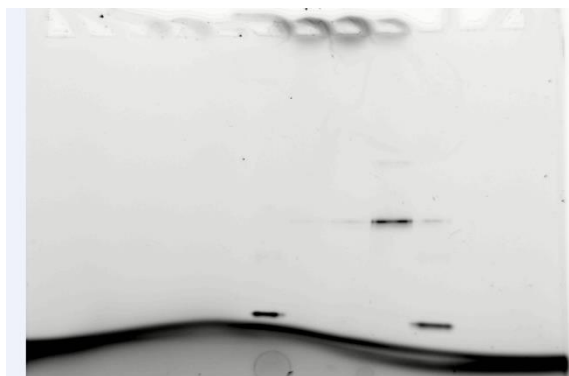

- 1) rTv20S+DMSO
- 2) rTv20S+CP17
- 3) rTv20S+MZB
