# Supplementary material for: Structural elucidation of recombinant Trichomonas vaginalis 20S proteasome bound to covalent inhibitors
Source: PubMed Central journal article supplement (PMC11452676; doi:10.1038/s41467-024-53022-w), 2024-10-04
Supplement: 41467_2024_53022_MOESM3_ESM.pdf [file 41467_2024_53022_MOESM3_ESM.pdf]

## **Description of Additional Supplementary Files**

### **File Name: Supplementary Data 1**

**Description:** This file contains proteomic analysis of rTv20S showing that the most abundant proteins correspond to each of the 14 subunits.
